# 1 **Efficient SARS-CoV-2 detection utilizing chitin-immobilized nanobodies** 2 **synthesized in *Ustilago maydis***

3 **Magnus Philipp<sup>1</sup>, Lisa Müller<sup>2</sup>, Marcel André<sup>2</sup>, Kai P. Hussnaetter<sup>1</sup>, Heiner Schaal<sup>2</sup>, Michael**  
4 **Feldbrügge<sup>1</sup> and Kerstin Schipper<sup>1\*</sup>**

5 <sup>1</sup> Institute for Microbiology, Heinrich Heine University Düsseldorf, Universitätsstraße 1, 40225  
6 Düsseldorf, Germany

7 <sup>2</sup> Institute of Virology, Medical Faculty, Heinrich Heine University Düsseldorf, Universitätsstraße 1,  
8 40225 Düsseldorf, Germany

9

10 \* Corresponding author:

11 Kerstin Schipper

12 E-mail: [kerstin.schipper@uni-duesseldorf.de](mailto:kerstin.schipper@uni-duesseldorf.de)

13

14 **Running Header:** A chitin-based virus detection system

15 **Keywords:** Nanobody, SARS-CoV-2, chitin, chitinase, *Ustilago maydis*

16

## 17 **Abstract**

18 The COVID-19 pandemic has greatly impacted the global economy and health care systems,  
19 illustrating the urgent need for timely and inexpensive responses to a pandemic threat in the form of  
20 vaccines and antigen tests. The causative agent of COVID-19 is SARS-CoV-2. The spike protein on  
21 the virus surface interacts with the human angiotensin-converting enzyme (ACE2) via the so-called  
22 receptor binding domain (RBD), facilitating virus entry. The RBD thus represents a prime target for  
23 vaccines, therapeutic antibodies, and antigen test systems. Currently, antigen testing is mostly  
24 conducted by qualitative flow chromatography or via quantitative ELISA-type assays. The latter  
25 mostly utilize materials like protein-adhesive polymers and gold or latex particles. Here we present an  
26 alternative ELISA approach using inexpensive materials and permitting quick detection based on  
27 components produced in the microbial model *Ustilago maydis*. In this fungus, heterologous proteins  
28 like biopharmaceuticals can be exported by fusion to unconventionally secreted chitinase Cts1. As a  
29 unique feature, the carrier chitinase binds to chitin allowing its additional use as a purification or  
30 immobilization tag. In this study, we produced different mono- and bivalent SARS-CoV-2 nanobodies

31 directed against the viral RBD as Cts1 fusions and screened their RBD binding affinity *in vitro* and *in*  
32 *vivo*. Functional nanobody-Cts1 fusions were immobilized on chitin forming an RBD tethering surface.  
33 This provides a solid base for future development of an inexpensive antigen test utilizing  
34 unconventionally secreted nanobodies as RBD trap and a matching ubiquitous and biogenic surface  
35 for immobilization.

36

## 37 **1 Introduction**

38 The current COVID-19 pandemic challenges not only global healthcare systems and economies but  
39 has also underlined the strong demand for novel and versatile strategies to fight viral pandemics. In  
40 this regard, major innovations have already been driven by the pandemic, exemplified by the prompt  
41 development of mRNA-based vaccines (Kudlay and Svistunov 2022). Furthermore, the adaptation of  
42 monoclonal antibody therapeutics formerly mostly used in cancer patients for the treatment of COVID-  
43 19 represented an important step (Sun and Ho 2020, Bierle et al. 2021).

44 COVID-19 is caused by SARS-CoV-2. With the onset of the pandemic, the structure of the  
45 virus has been elucidated both on RNA (Jain et al. 2020) and protein level (Korber et al. 2020, Ou et  
46 al. 2020, Walls et al. 2020, Wrapp et al. 2020b). The spike protein complex was identified as a key  
47 player, as it is not only exposed on the surface of the viral particle, but also enables the attachment of  
48 the virus to the host cell via the human Angiotensin receptor 2 (ACE2) (Wang et al. 2020a). This  
49 mechanism has also been observed for other beta corona viruses like SARS-CoV (Hulswit et al. 2016).  
50 Spike proteins of these viral species usually consist of the two main subunits S2 and S1. S2 mainly  
51 serves as anchor of the protein in the viral membrane and also mediates fusion of the viral envelope  
52 and the host cell membrane (Hulswit et al. 2016). S1 is responsible for ACE2 binding (Wang et al.  
53 2020a). Corona virus S1 proteins are generally organized into four domains, of which domains A and  
54 B form the receptor binding domain (RBD) which mediates ACE2 binding (Li et al. 2003, Wang et al.  
55 2020a). The B subdomain of the RBD carries an extended loop that is highly variable among corona  
56 virus species and therefore also referred to as hypervariable region (Kirchdoerfer et al. 2016). All  
57 SARS-CoV-2 variants of concern that have been structurally elucidated to date (B.1.1.7 Alpha, B.1.351  
58 Beta and B.1617 Delta and B.1.1.529 Omicron) carry mutations within the RBD domain that are  
59 assumed to play a role in infectivity and transmissibility of the virus (Baral et al. 2021, Torjesen 2021,  
60 VanBlargan et al. 2022). Therefore, the spike protein and especially its RBD domain are key targets  
61 for the development of therapeutics and vaccines.

62 The majority of vaccines cleared for use to date use an mRNA template of the spike protein  
63 that is translated in the host to evoke an immune response (Callaway 2020, Fernandes et al. 2022).  
64 However, since it was realized that vaccinated persons can still be infected with and spread SARS-  
65 CoV-2, there is a strong pressure to further develop test systems and therapeutics for a multi-layered  
66 strategy for COVID-19 treatment and control of SARS-CoV-2 spreading. Antibodies are key to both  
67 test systems and drug development. *Camelidae* and shark derived single heavy chain antibodies and  
68 derived nanobodies are emerging as potent alternatives to conventional antibodies (Muyldermans  
69 2013, Salvador et al. 2019). *Camelidae* type antibodies only carry a heavy chain on their IgG scaffold  
70 as opposed to the light- and heavy chain of regular mammalian antibodies (Muyldermans 2013). This  
71 heavy chain alone (the so-called nanobody) can be quickly adapted to novel targets such as SARS-  
72 CoV-2 and production in microbial hosts is straightforward (Muyldermans et al. 2009, Wrapp et al.  
73 2020a). Nanobodies have been shown to bind ligands in the nanomolar range and are stable under  
74 conditions of chemical and heat induced stress (Muyldermans 2013), which makes them promising  
75 molecules for widespread antigen testing. To this end several SARS-CoV-2 nanobodies engineered  
76 synthetically via phage display or generated directly by immunization of llamas, alpacas, and sharks  
77 have been published (Custodio et al. 2020, Gauhar et al. 2021, König et al. 2021).

78 We utilize the yeast form of the microbial model *Ustilago maydis* to produce heterologous  
79 proteins including alternative antibody formats like single chain variable fragments (scFvs) and  
80 nanobodies (Sarkari et al. 2014, Terfrüchte et al. 2017). Recently, we also established production of  
81 functional synthetic anti-SARS-CoV-2 nanobodies as a proof-of-principle for protein  
82 biopharmaceuticals (Philipp et al. 2021). For secretion of heterologous target proteins, a recently  
83 described unconventional secretion mechanism used by fungus to export chitinase Cts1 during  
84 cytokinesis is exploited (Reindl et al. 2019). Therefore, proteins of interest are fused to Cts1 which  
85 serves as a carrier for the export into the culture supernatant (Stock et al. 2012, Stock et al. 2016). Cts1  
86 exhibits chitin binding activity making it a potential build-in immobilization- and purification tag  
87 (Terfrüchte et al. 2017). In addition, Jps1, a potential anchoring factor needed for Cts1 secretion is  
88 released into the culture medium and can be employed as alternative carrier (Philipp et al. 2021). Of  
89 note, proteins directed to the unconventional secretion pathway are not decorated with potentially  
90 harmful post translational protein modifications such as *N*-glycosylation which could lead to strong  
91 reactions in patients when proteins are applied as biopharmaceuticals (Stock et al. 2012).

92 Here, we exploited the dual functionality of chitinase Cts1 to produce different published SARS-  
93 CoV-2 nanobody versions via unconventional Cts1 secretion in *U. maydis*. Nanobody fusions were  
94 screened for their antigen binding activity *in vitro* and *in vivo*. Using the most promising binders, we

95 established a novel strategy of RBD detection using a chitin surface for immobilization. In the future,  
96 these components can be combined to design a novel inexpensive and versatile virus detection system  
97 based on fungal compounds and a cognate biogenic chitin surface.

98

## 99 **2 Results**

### 100 **2.1 Functional comparison of SARS-CoV-2 nanobody variants produced by** 101 **unconventional secretion**

102 Recently, we established Jps1 as an alternative carrier for heterologous proteins using the  
103 production of synthetic nanobodies against SARS-CoV-2 as a test case. We were successful in  
104 generating a functional bivalent nanobody directed against SARS-CoV-2 spike protein RBD (Sy<sup>68/15</sup>-  
105 Jps1) (Philipp et al. 2021). However, nanobody export mediated by Cts1 is also of great interest due to  
106 its natural ability in mediating both the export of heterologous proteins and chitin binding. The latter  
107 property is of potential high value with respect to protein purification and immobilization. Thus, to test  
108 the dual applicability of Cts1, we first screened different nanobody-Cts1 fusions for their expression,  
109 unconventional secretion and binding activity against SARS-CoV-2 RBD using Sy<sup>68/15</sup>-Jps1 as a  
110 benchmark (Fig. 1A). To this end four different strains were generated that produce anti-RBD  
111 nanobody versions fused to Cts1. These nanobody versions included the two synthetic nanobodies  
112 generated by Wagner et al. (2020) as single entities (Sy<sup>15</sup>-Cts1, Sy<sup>68</sup>-Cts1) and two llama-derived  
113 nanobodies VHH E and VHH V (here termed VHH<sup>E</sup> and VHH<sup>V</sup>) generated by König et al. (2021)  
114 (VHH<sup>E</sup>-Cts1, VHH<sup>V</sup>-Cts1). In addition, a strain expressing a hetero bivalent version, pairing VHH<sup>E</sup>  
115 with VHH<sup>V</sup>, was designed, since these were shown to display synergistic activity (König et al. 2021)  
116 (VHH<sup>VE</sup>-Cts1). Finally, a strain for production of a double mono bivalent VHH<sup>E</sup> version was generated  
117 to test the binding capability of dimers with identical antigen binding sites (VHH<sup>EE</sup>-Cts1). The  
118 published synthetic nanobody versions Sy<sup>68/15</sup>-Cts1 (no antigen binding activity) and bivalent Sy<sup>68/15</sup>-  
119 Jps1 (alternative carrier; shows binding activity), pairing two synthetic nanobodies with different  
120 antigen binding sites, served as controls (Philipp et al. 2021). *U. maydis* expression strains for all  
121 protein versions were generated in the background of laboratory strain AB33P8Δ lacking eight  
122 extracellular proteases to optimize secretory yield (Terfrüchte et al. 2018). Expression and secretion of  
123 all versions was investigated via Western blot analyses. In cell extracts fusion proteins of the expected  
124 sizes were present for all variants, however, huge differences in expression level were observed. The  
125 analysis of culture supernatants confirmed sufficient secretion for the variants Sy<sup>15</sup>-Cts1, VHH<sup>E</sup>-Cts1,  
126 VHH<sup>V</sup>-Cts1, VHH<sup>EE</sup>-Cts1 and Sy<sup>68/15</sup>-Jps1, again displaying strong variation in the detected amounts

127 (Fig. 1 B, Suppl. Fig. 1 A, B). To test for RBD binding activity, cell extracts of all strains containing  
128 nanobody-Cts1 fusions were subjected to direct ELISA assays, using recombinant RBD as a bait and  
129 a commercial antibody sandwich for detection. The strongest binding was achieved for VHH<sup>EE</sup>-Cts1  
130 and Sy<sup>68/15</sup>-Jps1 while VHH<sup>E</sup>-Cts1 showed about half the signal intensity. All other variants lacked  
131 clear volumetric binding activity (Fig. 1 C, Suppl. Fig. 1 C). Overall, significant binding activity could  
132 be demonstrated for 3 of the 8 nanobody variants and binding capabilities of nanobodies were improved  
133 in the multimerized variant of VHH<sup>EE</sup>-Cts1.

134 To further substantiate the results, the three most promising nanobody versions VHH<sup>EE</sup>-Cts1,  
135 VHH<sup>E</sup>-Cts1 and Sy<sup>68/15</sup>-Jps1 were purified and subjected to direct ELISA against the full length S1  
136 protein using an Anti-SARS-CoV-2 QuantiVac ELISA-kit including controls (Fig. 1 D). All variants  
137 depicted significant binding activity with VHH<sup>E</sup>-Cts1 binding at concentrations of 5 ng/ $\mu$ l and 10 ng/ $\mu$ l  
138 and both VHH<sup>EE</sup>-Cts1 and Sy<sup>68/15</sup>-Jps1 showing more than two-fold elevated binding compared to  
139 VHH<sup>E</sup>-Cts1. In essence, two functional nanobody-Cts1-fusion proteins were obtained which were  
140 comparable to the current benchmark Sy<sup>68/15</sup>-Jps1, recognizing both recombinant RBD and full length  
141 S1 protein.

142

143

144

145

146

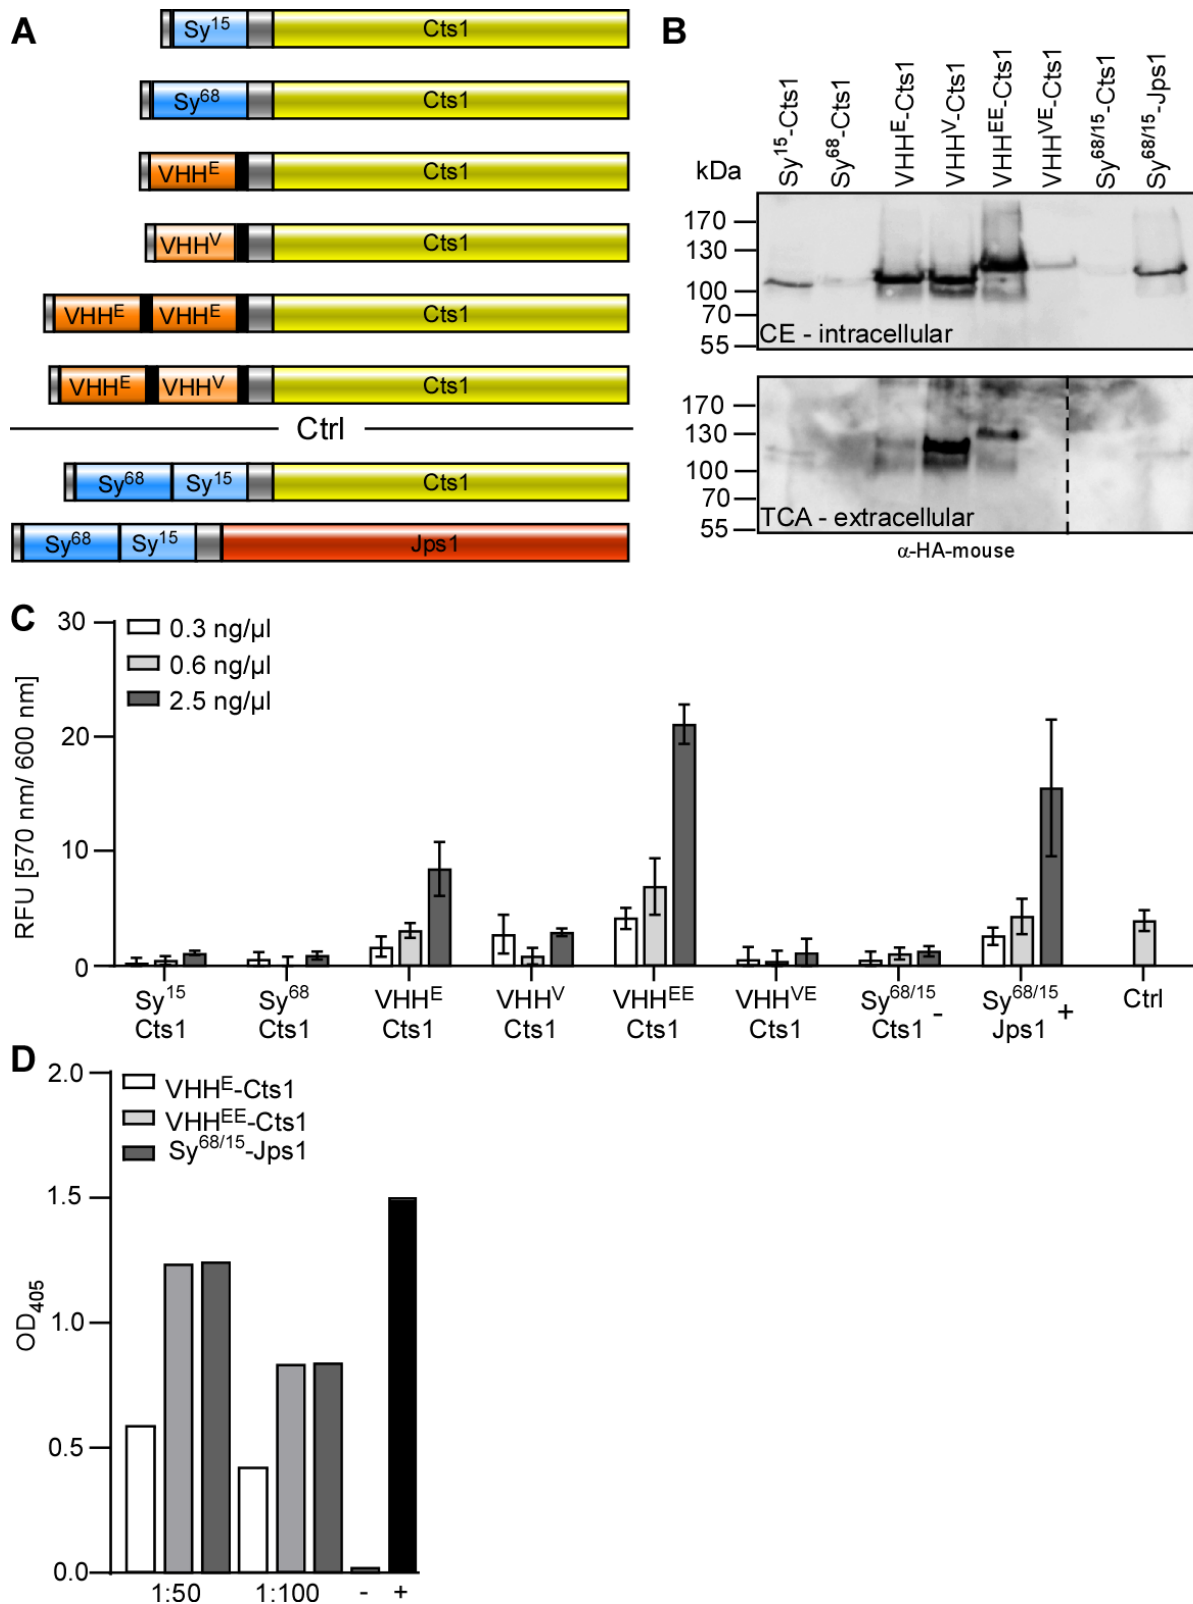

147  
 148 **Figure 1: Functional screen of anti-SARS-CoV-2 nanobody-Cts1-fusion variants.** (A) Schematic representation of  
 149 nanobody protein variants fused to chitinase Cts1 as a carrier for unconventional secretion. Synthetic nanobodies Sy<sup>15</sup> and  
 150 Sy<sup>68</sup> as well as llama-derived nanobodies VHH<sup>E</sup>, VHH<sup>V</sup> and bivalent VHH<sup>VE</sup> as well as a tandem VHH<sup>E</sup> (VHH<sup>EE</sup>) were  
 151 fused to Cts1 (yellow) via an HA-tag (grey) for detection. A His-tag (grey) was added at the N-terminus as a purification

152 tag. In the case of the VHH<sup>E</sup> and VHH<sup>V</sup> nanobodies GS-linkers (black) introduced by (König et al. 2021) were placed  
153 between individual nanobodies and between the nanobodies and Cts1. Sy<sup>68/15</sup>-Cts1 and Sy<sup>68/15</sup>-Jps1 (Philipp et al., 2021)  
154 dealt as negative and positive control, respectively. Protein schemes drawn to scale. **(B)** Western blot analysis to detect  
155 nanobody expression and secretion levels. Top, cell extracts: 10 µg of cell extracts producing the indicated protein variants  
156 were subjected to Western blot analysis. Bottom, culture supernatants of strains producing indicated protein variants.  
157 Proteins were enriched from the supernatant via TCA precipitation, the HA tag was used for detection. Nanobody-Cts1-  
158 fusions were detected using an HA-mouse antibody and migrate slightly above their expected sizes around 100 kDa. **(C)**  
159 Direct ELISA of nanobody-Cts1-fusions against 1 µg/well of RBD domain coated to ELISA plate and detected by a  
160 sandwich of anti-HA (mouse) and an anti-mouse-HRP conjugate. Cell extracts of indicated expression strains were added  
161 to wells in serial dilutions of 0.3 ng/µl, 0.6 ng/µl and 2.5 ng/µl. The experiment was carried out in three biological replicates.  
162 Error bars depict standard deviation. **(D)** Direct ELISA of nanobody-Cts1 fusions against full length spike protein directly  
163 detected with an anti-HA-HRP conjugate. Purified nanobody-fusions (100 µg/ml) were added to wells in dilutions of 1:50  
164 and 1:100 in technical triplicates. One biological replicate is shown. (+) and (-) indicate controls included in QuantiVac  
165 ELISA-kit.

166

## 167 **2.2 *In vivo* activity of nanobody-Cts1 fusions**

168 To determine if *in vitro* binding to SARS-CoV-2 RBD translates to binding or even virus neutralization  
169 *in vivo*, adjusted neutralization assays were applied. These assays are widely used to test sera of  
170 vaccinated or recovered patients for SARS-CoV-2 neutralizing antibodies (Matusali et al. 2021, Müller  
171 et al. 2021). In this adjusted neutralization assay, infectious SARS-CoV-2 viral particles were diluted  
172 two-fold starting at 100 TCID<sub>50</sub> (tissue culture infectious dose 50). Dilutions were then pre-incubated  
173 with the purified functional nanobody variants VHH<sup>E</sup>-Cts1, VHH<sup>EE</sup>-Cts1 and Sy<sup>68/15</sup>-Jps1. The  
174 mixtures were subsequently used to inoculate Vero cell cultures displaying the ACE2 receptor on their  
175 surface to analyze viral replication. To quantify infection and neutralization, qPCR analysis was carried  
176 out for each replicate at the onset of infection and at three days' post infection. VHH<sup>E</sup>-Cts1 showed no  
177 virus neutralization with strongly declining Ct values between t<sub>0</sub> and t<sub>3</sub>, indicating a replicative  
178 infection. VHH<sup>EE</sup>-Cts1 on the other hand showed neutralization up to 25 TCID<sub>50</sub> and Sy<sup>68/15</sup>-Jps1 up  
179 to 50 TCID<sub>50</sub> as indicated by stable Ct values (Fig. 2 A). These results confirm the functionality of the  
180 nanobody fusions VHH<sup>EE</sup>-Cts1 and Sy<sup>68/15</sup>-Jps1 even towards infectious virus. Given that binding does  
181 not necessarily reflect neutralization, but neutralization definitely includes binding, this also confirms  
182 that these two versions are capable of binding SARS-CoV-2 *in vivo*.

183



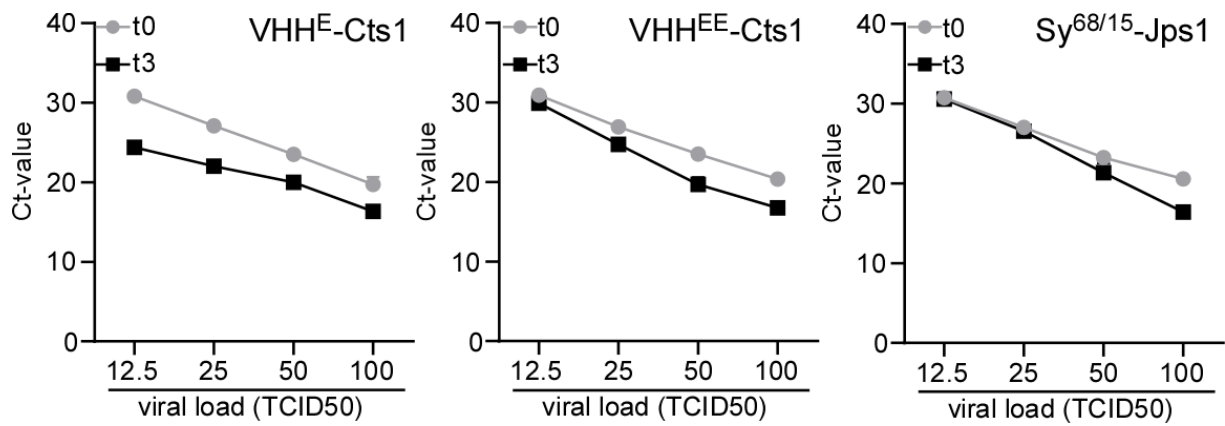

184

185 **Figure 2: Neutralization assays conducted with anti-SARS-CoV-2 nanobody fusions produced in *U. maydis*. (B)**

186 qPCR analysis of infected mammalian cells to detect viral RNA in cell cultures treated with purified nanobody

187 fusions/SARS-CoV-2 mixtures. Ct-values of samples at the onset of infection (t0) and three days' post infection (t3)

188 are depicted for each viral load and the respective applied nanobody fusion. Strong differences between Ct values of t0 and t3

189 indicate infection. Mean values of three biological replicates are depicted.

190

### 191 **2.3 Characterization of Cts1 chitin binding and immobilization**

192 Cts1 is capable of binding to chitin-coated surfaces like chitin magnetic beads without obvious

193 degradation of the polymer (Terfrüchte et al. 2017). This observation could be developed into a strategy

194 for a novel antigen test using an inexpensive surface based on bulk chitin obtained from crab shell or

195 insects for immobilization of Cts1-nanobody fusions. To test chitin immobilization, we first

196 recapitulated chitin binding on chitin beads using purified recombinant Cts1 (Fig. 3 A). Therefore,

197 beads were mixed with recombinant Cts1 produced in *Escherichia coli*. After thorough washing, Cts1

198 was eluted from the beads, indicating stable binding and confirming previous results (Terfrüchte et al.

199 2017). Analysis of the fractions indicated that a significant amount of the protein was lost in the flow-

200 through, suggesting that binding efficiency could be further improved in the future (Fig. 3 B). Next,  $\beta$ -

201 glucuronidase (Gus)-Cts1 (Stock et al. 2012) obtained from *U. maydis* was used to quantify previous

202 results (Terfrüchte et al. 2017) in the native system and to further characterize the chitin binding

203 capacity of fusion proteins. Gus-Jps1 (Reindl et al. 2020), which is not predicted to bind to chitin, was

204 used as a negative control (Fig. 3 C). Chitin beads were coated with the respective Gus-fusion proteins

205 purified from *U. maydis* while washing and elution procedures were kept consistent to experiments

206 carried out with recombinant Cts1. Indeed, Gus-Cts1 bound to chitin beads while no binding was

207 observed for Gus-Jps1, confirming the binding capability of N-terminal Cts1-fusion proteins (Fig. 3

208 D). Quantification of signal intensities of the different fractions obtained in both experiments indicated

209 that about 44% of the recombinant Cts1 and 68% of the native Gus-Cts1-fusion protein was captured



210 by the beads (Fig. 3 E). To finally assay if the fusion protein is functional after immobilization, Gus  
 211 activity was determined on chitin beads previously incubated with raw cell extracts of the Gus-Cts1  
 212 expression strain. Activity could specifically be detected on beads incubated with Gus-Cts1 containing  
 213 cell extracts while the controls showed only background activity (Fig. 3 F). In essence, functional Cts1-  
 214 fusion proteins can be immobilized on chitin beads and immobilization can even be achieved directly  
 215 from raw cell extracts.  
 216

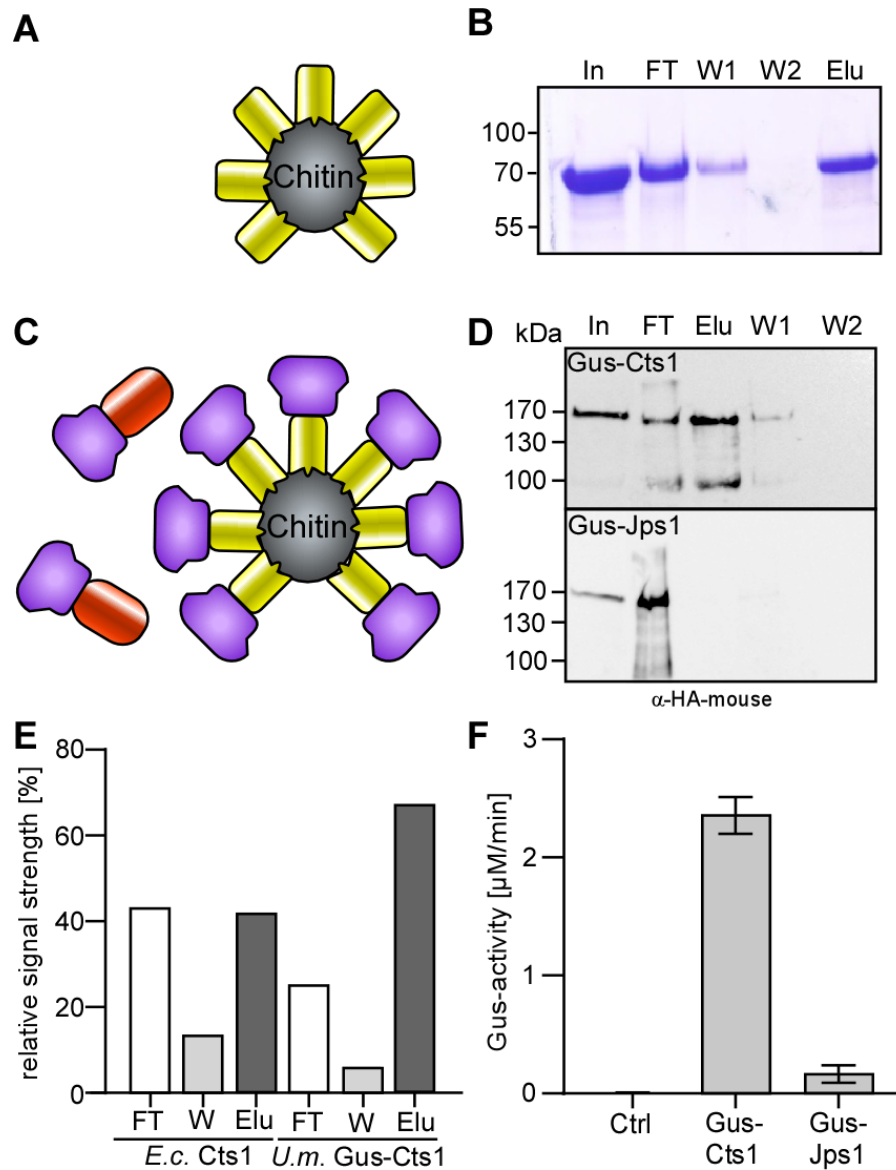

217  
 218 **Figure 3: Chitin binding capabilities of Cts1 and Cts1-fusion proteins.** (A) Experimental setup for initial Cts1 chitin  
 219 binding experiments. *E. coli* derived, purified Cts1 (yellow) was coated to magnetic chitin beads, washed and subsequently  
 220 eluted by boiling. (B) Coomassie-stained SDS-PAGE of different fractions obtained in the binding studies with recombinant  
 221 Cts1 from *E. coli*: input (In), flow-through (FT), wash (W1 and W2) and elution (Elu) fractions of the experiment. (C)  
 222 Experimental setup for Cts1 chitin binding experiments using *U. maydis* derived Gus-fusion proteins. Gus-Cts1 (purple-

223 yellow) was coated to chitin beads, while a second set of beads treated with Gus-Jps1 (purple-red) dealt as a negative  
224 control. **(D)** Western blot analysis of input (In), flow-through (FT), wash (W1 and W2) and elution (Elu) fractions of  
225 purified Gus-Cts1 and Gus-Jps1-fusion protein incubated with chitin beads. **(E)** Relative quantification of SDS-PAGE and  
226 Western blot depicted in panels B and D. **(F)** On-bead Gus assays conducted with cell extracts of Gus-Cts1 and Gus-Jps1  
227 incubated with chitin beads. After washing a Gus activity assay was conducted. Conversion from 4-MUG to 4-MU was  
228 monitored for 1 h. Cell extracts with Gus-Jps1 and of the progenitor strain (Ctrl) dealt as a negative control. Mean values  
229 of three biological replicates are shown. Error bars depict standard deviation.

## 230 **2.4 Assessing the potential of anti-SARS-CoV-2 nanobody-Cts1 fusions for RBD** 231 **capturing and chitin binding**

232 To determine the capturing capabilities of the most promising nanobody variants VHH<sup>E</sup>-Cts1  
233 and VHH<sup>EE</sup>-Cts1, sandwich immunosorbent assays were conducted both on ELISA plates and non-  
234 classically on chitin beads. Sy<sup>68/15</sup>-Jps1 dealt as a control for both assays as it should show activity in  
235 plate-based ELISA but not on a chitin surface. In the first experiment, purified VHH<sup>E</sup>-Cts1, VHH<sup>EE</sup>-  
236 Cts1 and Sy<sup>68/15</sup>-Jps1 were coated to ELISA plates, incubated with serial dilutions of recombinant RBD  
237 and subsequently detected by a commercial RBD antibody and a cognate HRP conjugate (Fig. 4 A). In  
238 this plate-based ELISA all three nanobody variants were capable of capturing the RBD, however, only  
239 the most potent versions VHH<sup>EE</sup>-Cts1 and Sy<sup>68/15</sup>-Jps1 showed volumetric activity for serial RBD  
240 dilutions. As observed in the direct ELISA, VHH<sup>EE</sup>-Cts1 showed the strongest binding capability even  
241 at the lowest RBD concentration of 0.1 ng/μl after a detection time of 10 min, showing significantly  
242 stronger binding than VHH<sup>E</sup>-Cts1 which did neither reveal significant binding at 0.1 ng/μl nor  
243 volumetric activity with rising concentrations (Fig. 4 B). To determine if detection of RBD domain at  
244 similar concentrations can also be achieved using a chitin surface, chitin beads were incubated with  
245 purified VHH<sup>E</sup>-Cts1, VHH<sup>EE</sup>-Cts1 and Sy<sup>68/15</sup>-Jps1, mixed with RBD and again binding was detected  
246 using commercial antibodies (Fig. 4 C). Activity was obtained for both VHH<sup>E</sup>-Cts1 and VHH<sup>EE</sup>-Cts1,  
247 while no significant signal could be detected for Sy<sup>68/15</sup>-Jps1. As observed before, values for VHH<sup>EE</sup>-  
248 Cts1 were about doubled compared to those for VHH<sup>E</sup>-Cts1 (Fig. 4 D). In summary, these results  
249 demonstrate the potential of chitin-based ELISA using SARS-CoV-2 nanobody-Cts1-fusions and its  
250 specificity for the bifunctional Cts1 dealing as carrier and anchor for immobilization.

251

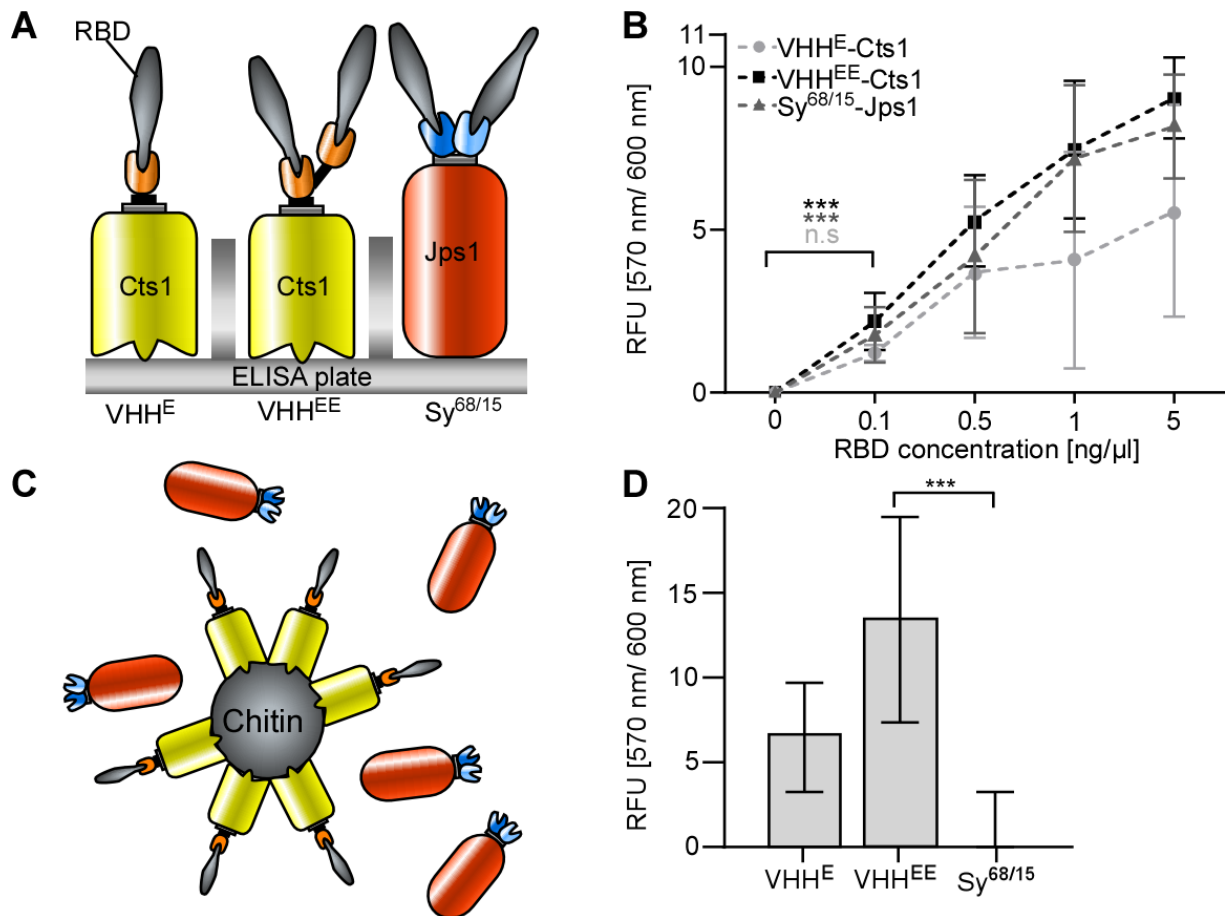

252

253 **Figure 4: Plate- and chitin-based sandwich ELISA using Cts1-nanobody fusions for detection of SARS-CoV-2 RBD.**

254 (A) Experimental setup of plate-based sandwich ELISA. The indicated nanobody-Cts1 fusions were used as capture

255 antibodies for serial dilutions of recombinant SARS-CoV-2 RBD (grey). (B) Quantitative results of plate-based sandwich

256 ELISA. RBD (grey) was detected using an anti-RBD-(mouse) antibody and an anti-mouse-HRP conjugate. Mean values of

257 three biological replicates are shown. Error bars depict standard deviation. Definition of statistical significance (\*\*\*)

258 p-value < 0.05. (C) Experimental setup of chitin-based sandwich ELISA test. The indicated nanobody-Cts1 fusions were

259 coated to chitin beads to serve as capturing nanobodies, while Sy<sup>68/15</sup>-Jps1 dealt as negative control that is unable to bind

260 to chitin. (D) Quantitative results of chitin-based sandwich ELISA. RBD was detected using an anti-RBD (mouse) antibody

261 and anti-mouse-HRP conjugate. Sy<sup>68/15</sup>-Jps1 dealt as a negative control. Mean values of three biological replicates are

262 shown. Error bars depict standard deviation. Definition of statistical significance (\*\*\*)

263 p-value < 0.05.

264 To further characterize the RBD capturing capabilities of the chitin-based detection system, the

265 volumetric binding activity of the system was determined. Based on previous results, VHHEE-Cts1 was

266 chosen as the most potent capturing nanobody. To this end, chitin beads were loaded with purified

267 VHHEE-Cts1, subsequently incubated with recombinant RBD in serial dilutions and detected with a

268 commercial antibody sandwich as described above (Fig. 5 A). A colorimetric reaction was obtained

269 within a timeframe of two minutes, reflecting the rising input of the commercial RBD (Fig. 5 B).

270 Quantitative fluorescence measurements of the samples confirmed these visual results (Fig. 5 C).  
271 Hence, overall, volumetric detection of SARS-CoV-2 RBD on a chitin surface is feasible, sensitive in  
272 the nanomolar range and in the given setup even faster than on a conventional ELISA plate.

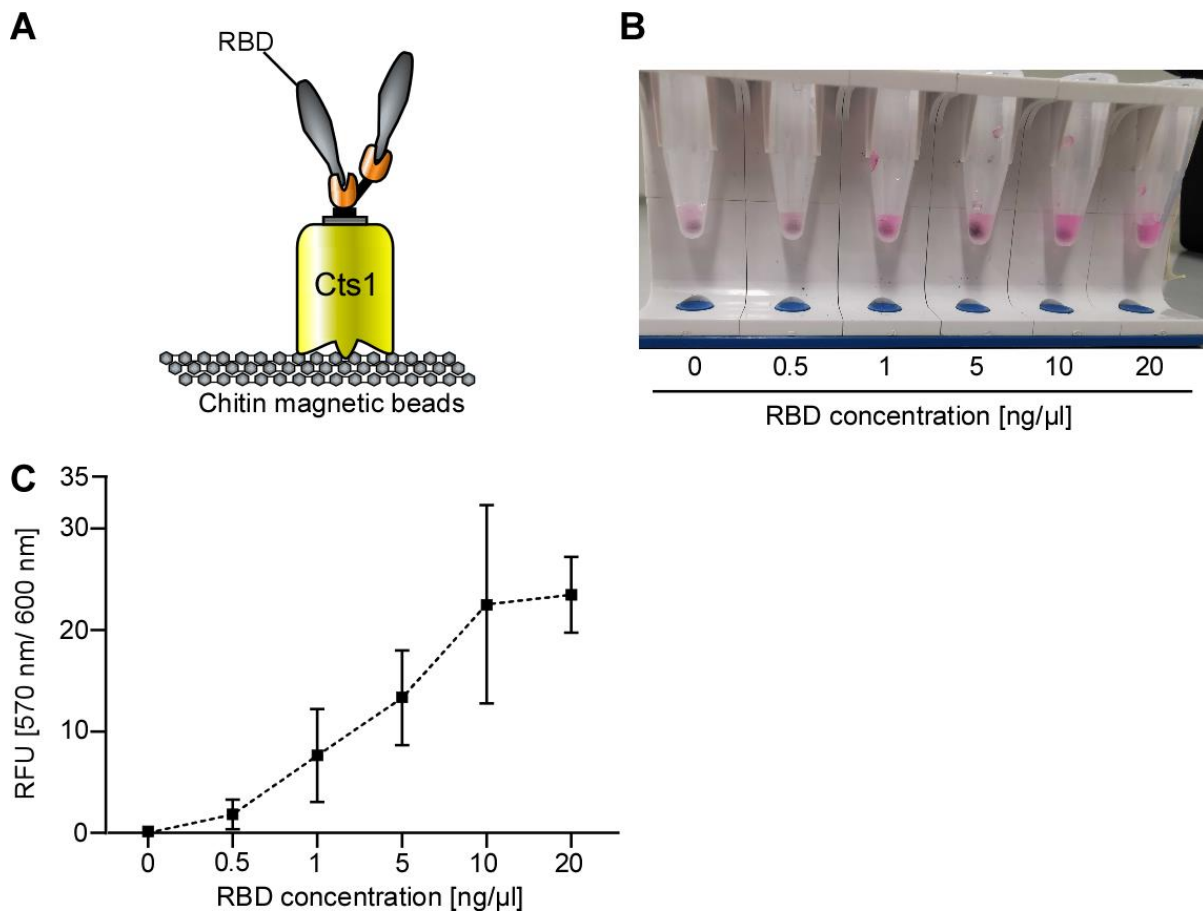

273  
274 **Figure 5: Chitin-based antigen test.** (A) Setup of chitin-based ELISA. VHH<sup>EE</sup>-Cts1 binds to the chitin magnetic beads  
275 and is used as capture antibody for SARS-CoV-2 RBD. (B) RBD was added to VHH<sup>EE</sup>-Cts1 coated magnetic chitin beads  
276 in serial dilutions and subsequently detected using anti RBD (mouse) and anti-mouse-HRP antibodies. Picture depicts one  
277 representative replicate of the observed colorimetric reaction in reaction tubes. (C) Quantitative read-out of fluorescence  
278 measurements from chitin beads coated with VHH<sup>EE</sup>-Cts1, treated with serial dilutions of SARS-CoV-2 RBD. Mean values  
279 of three biological replicates are shown. Error bars depict standard deviation.

280

281

### 282 3 Discussion

283 The aim of this study was to expand the repertoire of pharmaceutically relevant proteins produced  
284 in *U. maydis* towards versatile nanobodies for virus detection. To this end, Cts1-mediated secretion of  
285 active camelid-derived single- and bivalent nanobodies directed against the SARS-CoV-2 RBD was  
286 achieved. As an important strategical step towards industrial application, the produced nanobody

287 fusions were immobilized on chitin, exploiting the natural capabilities of Cts1 and thus enabling  
288 detection of the cognate antigen via chitin-based ELISA.

289 The utilization of protein tags like Cts1 to export “passenger” proteins or peptides is a routine  
290 strategy in both bacterial and fungal hosts (Fleissner and Dersch 2010). Classical carriers are  
291 extracellular proteins that are naturally secreted in very high amounts and can be used as export proteins  
292 to guarantee high yields of secreted fusion protein. One such example are carbohydrate-active proteins  
293 like CBH1 from *Trichoderma reesei* (Zhong et al. 2011). As a positive side-effect, these protein tags  
294 can even enhance the solubility like shown for carbohydrate-binding module 66 (CBM66) in *E. coli*  
295 (Ko et al. 2021). In our study, different combinations of nanobody and Cts1 carrier resulted in varying  
296 levels of expression, secretion and activity. In addition, we observed a strong impact of the carrier  
297 choice on activity of the fused nanobody, confirming our earlier study (Philipp et al. 2021). While this  
298 underlines the necessity of a screening step of several constructs for each nanobody, it is in line with  
299 results obtained in other carrier based secretion systems (Wang et al. 2020b).

300 Similarly, also multiple powerful tags for protein purification and immobilization exist with the  
301 polyhistidin, the haemagglutinin or the SUMO tag as a few important examples (Porath et al. 1975,  
302 Field et al. 1988, Guerrero et al. 2015). The IMPACT system (New England Biolabs) even exploits a  
303 chitin-binding protein tag derived from *Mycobacterium xenopi* GyrA for protein purification with the  
304 intein tag (Chong et al. 1997, Chong et al. 1998). Importantly, in our system, chitinase Cts1 mediates  
305 both export and immobilization of the heterologous proteins. Thus, while normally carriers and tags  
306 for purification or immobilization are separated, Cts1 intrinsically combines both properties. This  
307 unique strategy will enable a very streamlined process design in the future.

308 Currently, we are using affinity chromatography to purify the Cts1-fusion proteins. In the  
309 future, the development of *in-situ* purification strategies for Cts1-fusion proteins from culture  
310 supernatant could greatly ease the purification process and thereby lower production costs of  
311 biopharmaceuticals. Similar non chromatographic purification processes have already proven  
312 successful using GST, biotin and streptavidin coated magnetic particles to purify protein from *E. coli*  
313 *cell* lysates (Franzreb et al. 2006) and supernatants (Fernandes et al. 2016) but also from human serum  
314 plasma (Santos et al. 2020).

315 In previous studies we had shown that chitin-coated beads are applicable for the purification of  
316 Cts1-fusion proteins (Terfrüchte et al. 2017). Now we expand on that and developed this interaction  
317 for nanobody immobilization in immunoassays. Since protein immobilization is generally achieved via  
318 protein adhesive polymers and not by specific protein-molecule interaction (Lin 2015, Andryukov  
319 2020) this provides a novel tool towards inexpensive surface coating. The use of bio-based polymers

320 for immobilization is of utmost interest since it allows for reduction of antigen test pricing and use of  
321 sustainable and inexpensive resources. To this end a similar study achieved SARS-CoV-2 detection  
322 based on nanobody immobilization on cellulose, albeit without using the immobilization tag for export  
323 at the same time (Sun et al. 2022).

324 Importantly, RBD capture capability of VHH<sup>EE</sup>-Cts1 in this study could be shown at  
325 concentrations in the low nanomolar range of 2.6 nM (0.1 ng/μl) in plate based ELISA, which is in the  
326 described range of other anti-RBD nanobodies between 0.9 nM and 30 nM (Weinstein et al. 2022),  
327 (Huo et al. 2020), (König et al. 2021). Moreover, published detection capacity of commercially  
328 available antigen tests is in the range of 0.65 pg/μl (nucleocapsid protein) to 5 ng/μl (spike protein)  
329 (Baker et al. 2020) (Grant et al. 2020). Thus, our chitin-based antigen detection system with a detection  
330 capacity of 0.5 ng/μl fits well into the described range, suggesting that it is competitive.

331 In a next step, we envision the application of our chitin immobilization strategy for nanobodies  
332 in virus detection for lateral flow assays. To date, detection of lateral flow assays is mostly enabled by  
333 colloidal gold particles (Oldenburg et al. 1998 , Billingsley et al. 2017). Current investigation on chitin  
334 as a building block for nanocrystals and hydrogels (Xu et al. 2020, Gu et al. 2021), as well as initial  
335 experiments on drug loaded chitin scaffolds (Kovalchuk et al. 2019) demonstrates that generation of  
336 colloidal chitin particles loaded with nanobodies is a future possibility to further lower antigen test  
337 prices by exchanging gold as basic resource for detection by chitin.

338 Of note, we did not only verify the applicability of the nanobodies in virus detection but also  
339 successfully tested the neutralization of SARS-CoV-2 *in vivo*. This confirms nanobody binding of the  
340 infectious virus as opposed to only the RBD domain *in vitro*, which is necessary for antigen test  
341 application. The neutralizing activity could further motivate research towards drug development using  
342 unconventionally secreted proteins from *U. maydis* which as maize pathogen induces the formation of  
343 edible tumors and can thus be considered innocuous for humans (Juarez-Montiel et al. 2011).  
344 Nanobodies are currently discussed as novel drug targets due to ease of production, multimerization  
345 and favorable *in vivo* attributes, such as improved tissue penetration and decreased immunogenicity  
346 (Bannas et al. 2017, Salvador et al. 2019). Neutralizing mAbs are normally employed in  
347 biopharmaceutical cocktails in patients (Marrocco et al. 2019, Sun and Ho 2020). This strategy is  
348 applicable to nanobodies as well, however a study has shown comparable SARS-CoV-2 neutralization  
349 between a nanobody cocktail and a bivalent version of the same nanobodies in hamster models (Pymm  
350 et al. 2021), demonstrating that cocktails are not required, when bivalent constructs are used. *U. maydis*  
351 might be especially suited for the generation and production of larger multivalent constructs, given its  
352 ability to secrete huge proteins via the unconventional secretion route with a lack of *N*-glycosylation



353 (Stock et al. 2012). Especially, since *N*-glycosylation has been shown to negatively affect  
354 pharmacokinetics of mAbs and even increased cytotoxicity before (Mastrangeli et al. 2020).

355 In summary, we provide a solid proof-of-principle for a chitin-based antigen test facilitated by  
356 components derived from unconventional secretion in *U. maydis*. We envision that in combination  
357 with sophisticated process engineering this technique could be developed into a lab-on-a-chip strategy  
358 (Zhuang et al. 2020). Thus, protein-based immobilization of nanobodies for target capture and  
359 detection are promising tools to develop alternative versatile and affordable technology for antigen  
360 testing.

361

## 362 **4 Materials and methods**

### 363 **4.1 Molecular biology methods**

364 All plasmids (pUMa/pUx vectors) generated in this study were obtained using standard  
365 molecular biology methods established for *U. maydis* including restriction ligation and Gibson cloning  
366 (Gibson et al. 2009). Enzymes for cloning were purchased from NEB (Ipswich, MA, USA). For the  
367 generation of pUMa4678 and 4679 *αgfpnb* was excised from pUMa2240 (Terfrüchte et al. 2017) by  
368 hydrolyzation with BamHI and SpeI. DNA sequences encoding for Sy<sup>15</sup> and Sy<sup>68</sup> (Walter et al. 2020)  
369 were amplified from synthetic gene blocks (IDT Coralville, IA, USA) using oligonucleotide pairs  
370 oAB908/oAB909 and oAB910/oAB911, respectively (Table 1). Subsequently PCR products were  
371 hydrolyzed with BamHI and SpeI and inserted into the backbone of pUMa2113 via restriction ligation  
372 cloning to generate pUMa4678 and 4679. Generation of pUx4 and pUx5 was achieved by excision of  
373 *αgfpnb* from pUMa2240 with BamHI and SpeI and amplification of *vhhe* and *vhhv* with BamHI and  
374 SpeI restriction sites from synthetic gene blocks using oligo nucleotide pairs oCD359/oCD360 and  
375 oCD363/oCD364, respectively. These sequences were subsequently hydrolyzed with BamHI and SpeI  
376 and inserted into the backbone of pUMa2240 via restriction ligation cloning, thereby generating pUx4  
377 and pUx5. pUx6 was generated in a similar manner. However, after the hydrolyzation of the  
378 pUMa2240 backbone *vhhe* was amplified once with a BamHI and EcoRI and once with an EcoRI and  
379 SpeI hydrolyzation sites. After hydrolyzation two sequences for *vhhe* were inserted into the open  
380 reading frame via restriction ligation cloning, thereby encoding for fusion protein VHH<sup>EE</sup>-Cts1. For  
381 the generation of pUx7 this process was repeated but instead of using two *vhhe* sequences with differing  
382 hydrolyzation sites, the first *vhhe* sequence with BamHI and EcoRI hydrolyzation sites was exchanged  
383 for *vhhv* with corresponding hydrolyzation sites.



384

385 **Table 1.** DNA oligonucleotides used in this study.

| Designation                     | Nucleotide sequence (5' - 3')                                                   |
|---------------------------------|---------------------------------------------------------------------------------|
| oMB372_jps1_fw                  | TTAGGCGCGCCATGCCAGGCATCTCC                                                      |
| oMB373_jps1_rev                 | TTAGGGCCCTTAGGATTCCGCATCGATTGGGG                                                |
| oAB908_Sy15_fw                  | ATATAGGATCCATGGCGGCCCATCACCACCATCACCACCATCACCACCA<br>TCATATGCAGGTGCAGCTCG       |
| oAB909_Sy15_rev                 | ATATAACTAGTCGAGACGGTGACCTGGGTGC                                                 |
| oAB910_Sy68_fw                  | TATAGGATCCATGGCGGCCCATCACCACCATCACCACCATCACCACCAT<br>CATATGCAGGTGCAGCTCGTCGAG   |
| oAB911_sy68_rev                 | ATATATACTAGTCGAGACGGTGACCTGGGTGC                                                |
| oCD359_VHH <sup>E</sup> _fw     | ATATAGGATCCATGGCGGCCCATCACCACCATCACCACCATCACCACCA<br>TCATATGCAGGTGCAGCTCGTCG    |
| oCD360_VHH <sup>E</sup> _rev    | ATATGAATTCATGCAGGTGCAGCTCGTCG                                                   |
| oCD361_VHH <sup>E</sup> _linker | ATATACTAGTAGAGCCACCACCACCAGAGCCACCACCACCAGAGCCACC<br>ACCACCCGACGAGACGGTGACGAGCG |
| oCD362_VHH <sup>E</sup> _linker | ATATGAATTCAGAGCCACCACCACCAGAGCCACCACCACCAGAGCCACC<br>ACCACCCGACGAGACGGTGACGAGC  |
| oCD363_VHH <sup>V</sup> _fw     | ATATAGGATCCATGGCGGCCCATCACCACCATCACCACCATCACCACCA<br>TCATATGCAGGTGCAGCTCGTCG    |
| oCD364_VHH <sup>V</sup> _rev    | ATATACTAGTAGAGCCACCACCACCAGAGCCACCACCACCAGAGCCACC<br>ACCACCCGACGAGACGGTGACCTGG  |
| oCD365_VHH <sup>V</sup> _linker | ATATGAATTCAGAGCCACCACCACCAGAGCCACCACCACCAGAGCCACC<br>ACCACCCGACGAGACGGTGACCTG   |

386

## 387 4.2 Strain generation

388 *U. maydis* strains used in this study were obtained by homologous recombination yielding  
389 genetically stable strains (Table 2). For genomic integrations at the *ip* locus, integrative plasmids were  
390 used (Stock et al. 2012). For genomic integration at the *ip* locus, integrative plasmids contained the *ip*<sup>f</sup>  
391 allele, promoting carboxin (Cbx) resistance. Thus, plasmids were linearized within the *ip*<sup>f</sup> allele using  
392 restriction enzymes SspI and SwaI to allow for homologous recombination with the *ip*<sup>s</sup> locus. For all  
393 genetic manipulations, *U. maydis* protoplasts were transformed with linear DNA fragments. All strains  
394 were verified by Southern blot analysis. For *in locus* modifications the flanking regions were amplified  
395 as probes. For *ip* insertions, the probe was obtained by PCR using the primer combination  
396 oMF502/oMF503 and the template pUMa260. Primer sequences are listed in Table 1.

397

398 **Table 2.** *U. maydis* strains used in this study.

| Strains                           | Relevant genotype/ Resistance                                                                                                                                                                                                                                                                                                       | Strain collection no. (UMa <sup>1</sup> ) | Plasmids transformed / Resistance <sup>2</sup> | Manipulated locus | Pro-genitor (UMa <sup>1</sup> ) | Reference              |
|-----------------------------------|-------------------------------------------------------------------------------------------------------------------------------------------------------------------------------------------------------------------------------------------------------------------------------------------------------------------------------------|-------------------------------------------|------------------------------------------------|-------------------|---------------------------------|------------------------|
| AB33P8Δ                           | <i>a2 P<sub>nar</sub>bW2bE1 PhleoR</i><br><i>FRT10[um04641Δ::hyg]</i><br><i>FRT11[um03947Δ]</i><br><i>FRT6[um03975Δ]</i><br><i>FRT5[um04400Δ]</i><br><i>FRT3[um11908Δ]</i><br><i>FRT2[um00064Δ]</i><br><i>FRTwt[um02178Δ]</i><br><i>FRT1[um04926Δ] HygR</i>                                                                         | 2413                                      |                                                | <i>um04926</i>    |                                 | Terfrüchte et al. 2018 |
| AB33P8Δ<br>Gus-Cts1               | <i>a2 P<sub>nar</sub>bW2bE1 PhleoR</i><br><i>FRT10[um04641Δ::hyg]</i><br><i>FRT11[um03947Δ]</i><br><i>FRT6[um03975Δ]</i><br><i>FRT5[um04400Δ]</i><br><i>FRT3[um11908Δ]</i><br><i>FRT2[um00064Δ]</i><br><i>FRTwt[um02178Δ]</i><br><i>FRT1[um04926Δ] HygR</i><br><i>ip<sup>S</sup>[P<sub>omagus</sub>:shh:cts1]ip<sup>R</sup>CbxR</i> | 2418                                      | pUMa2113                                       | <i>ip</i>         | 2413                            | Terfrüchte et al. 2018 |
| AB33P8ΔGus<br>-Jps1               | <i>a2 P<sub>nar</sub>bW2bE1 PhleoR</i><br><i>FRT10[um04641Δ::hyg]</i><br><i>FRT11[um03947Δ]</i><br><i>FRT6[um03975Δ]</i><br><i>FRT5[um04400Δ]</i><br><i>FRT3[um11908Δ]</i><br><i>FRT2[um00064Δ]</i><br><i>FRTwt[um02178Δ]</i><br><i>FRT1[um04926Δ] HygR</i><br><i>ip<sup>S</sup>[P<sub>omagus</sub>:shh:jps1]ip<sup>R</sup>CbxR</i> | 2900                                      | pUMa3012                                       | <i>ip</i>         | 2413                            | Philipp et al. 2022    |
| AB33P8Δ<br>Sy <sup>15</sup> -Cts1 | <i>a2 P<sub>nar</sub>bW2bE1 PhleoR</i><br><i>FRT10[um04641Δ::hyg]</i><br><i>FRT11[um03947Δ]</i><br><i>FRT6[um03975Δ]</i><br><i>FRT5[um04400Δ]</i><br><i>FRT3[um11908Δ]</i><br><i>FRT2[um00064Δ]</i><br><i>FRTwt[um02178Δ]</i>                                                                                                       | 3360                                      | pUMa4678                                       | <i>ip</i>         | 2413                            | This study             |

|                                      |                                                                                                                                                                                                                                                                                                                                                         |      |          |           |      |                     |
|--------------------------------------|---------------------------------------------------------------------------------------------------------------------------------------------------------------------------------------------------------------------------------------------------------------------------------------------------------------------------------------------------------|------|----------|-----------|------|---------------------|
|                                      | <i>FRT1[um04926A]</i> HygR<br><i>ip<sup>S</sup>[P<sub>omahis</sub>:sybody#15:ha:cts1]ip<sup>R</sup>Cb</i><br>xR                                                                                                                                                                                                                                         |      |          |           |      |                     |
| AB33P8Δ<br>Sy <sup>68</sup> -Cts1    | <i>a2 P<sub>nar</sub>bW2bE1</i> PhleoR<br><i>FRT10[um04641Δ::hyg]</i><br><i>FRT11[um03947Δ]</i><br><i>FRT6[um03975A]</i><br><i>FRT5[um04400A]</i><br><i>FRT3[um11908A]</i><br><i>FRT2[um00064A]</i><br><i>FRTwt[um02178A]</i><br><i>FRT1[um04926A]</i> HygR<br><i>ip<sup>S</sup>[P<sub>omahis</sub>:sybody#68:ha:cts1]ip<sup>R</sup>Cb</i><br>xR        | 3361 | pUMa4679 | <i>ip</i> | 2413 | This study          |
| AB33P8Δ<br>Sy <sup>68/15</sup> -Cts1 | <i>a2 P<sub>nar</sub>bW2bE1</i> PhleoR<br><i>FRT10[um04641Δ::hyg]</i><br><i>FRT11[um03947Δ]</i><br><i>FRT6[um03975A]</i><br><i>FRT5[um04400A]</i><br><i>FRT3[um11908A]</i><br><i>FRT2[um00064A]</i><br><i>FRTwt[um02178A]</i><br><i>FRT1[um04926A]</i> HygR<br><i>ip<sup>S</sup>[P<sub>omas</sub>sybody#68:his:sybody#15:ha:cts1]ip<sup>R</sup>CbxR</i> | Ux1  | pUx1     | <i>ip</i> | 2413 | Philipp et al. 2022 |
| AB33P8Δ<br>VHH <sup>E</sup> -Cts1    | <i>a2 P<sub>nar</sub>bW2bE1</i> PhleoR<br><i>FRT10[um04641Δ::hyg]</i><br><i>FRT11[um03947Δ]</i><br><i>FRT6[um03975A]</i><br><i>FRT5[um04400A]</i><br><i>FRT3[um11908A]</i><br><i>FRT2[um00064A]</i><br><i>FRTwt[um02178A]</i><br><i>FRT1[um04926A]</i> HygR<br><i>ip<sup>S</sup>[P<sub>omahis</sub>:vhhe:gs:ha:cts1]ip<sup>R</sup>CbxR</i>              | Ux4  | pUx4     | <i>ip</i> | 2413 | This study          |
| AB33P8Δ<br>VHH <sup>V</sup> -Cts1    | <i>a2 P<sub>nar</sub>bW2bE1</i> PhleoR<br><i>FRT10[um04641Δ::hyg]</i><br><i>FRT11[um03947Δ]</i><br><i>FRT6[um03975A]</i><br><i>FRT5[um04400A]</i><br><i>FRT3[um11908A]</i><br><i>FRT2[um00064A]</i><br><i>FRTwt[um02178A]</i>                                                                                                                           | Ux5  | pUx5     | <i>ip</i> | 2413 | This study          |

|                                      |                                                                                                                                                                                                                                                                                                                                                                    |     |      |           |      |                     |
|--------------------------------------|--------------------------------------------------------------------------------------------------------------------------------------------------------------------------------------------------------------------------------------------------------------------------------------------------------------------------------------------------------------------|-----|------|-----------|------|---------------------|
|                                      | <i>FRT1[um04926A]</i> HygR<br><i>ip<sup>S</sup>[P<sub>omahis</sub>:vhhv:gs:ha:cts1]ip<sup>R</sup>CbxR</i>                                                                                                                                                                                                                                                          |     |      |           |      |                     |
| AB33P8Δ<br>VHH <sup>EE</sup> -Cts1   | <i>a2 P<sub>nar</sub>bW2bE1</i> PhleoR<br><i>FRT10[um04641A::hyg]</i><br><i>FRT11[um03947Δ]</i><br><i>FRT6[um03975Δ]</i><br><i>FRT5[um04400A]</i><br><i>FRT3[um11908A]</i><br><i>FRT2[um00064A]</i><br><i>FRTwt[um02178Δ]</i><br><i>FRT1[um04926A]</i> HygR<br><i>ip<sup>S</sup>[P<sub>omahis</sub>:vhhe:gs:vhhe:gs:ha:cts1]i</i><br><i>p<sup>R</sup>CbxR</i>      | Ux6 | pUx6 | <i>ip</i> | 2413 | This study          |
| AB33P8Δ<br>VHH <sup>VE</sup> -Cts1   | <i>a2 P<sub>nar</sub>bW2bE1</i> PhleoR<br><i>FRT10[um04641A::hyg]</i><br><i>FRT11[um03947Δ]</i><br><i>FRT6[um03975Δ]</i><br><i>FRT5[um04400A]</i><br><i>FRT3[um11908A]</i><br><i>FRT2[um00064A]</i><br><i>FRTwt[um02178Δ]</i><br><i>FRT1[um04926A]</i> HygR<br><i>ip<sup>S</sup>[P<sub>omahis</sub>:vhhv:gs:vhhe:gs:ha:cts1]i</i><br><i>p<sup>R</sup>CbxR</i>      | Ux7 | pUx7 | <i>ip</i> | 2413 | This study          |
| AB33P8Δ<br>Sy <sup>68/15</sup> -Jps1 | <i>a2 P<sub>nar</sub>bW2bE1</i> PhleoR<br><i>FRT10[um04641A::hyg]</i><br><i>FRT11[um03947Δ]</i><br><i>FRT6[um03975Δ]</i><br><i>FRT5[um04400A]</i><br><i>FRT3[um11908A]</i><br><i>FRT2[um00064A]</i><br><i>FRTwt[um02178Δ]</i><br><i>FRT1[um04926A]</i> HygR<br><i>ip<sup>S</sup>[P<sub>omas</sub>sybody#68:his:sybody#15:ha:</i><br><i>jps1]ip<sup>R</sup>CbxR</i> | Ux8 | pUx8 | <i>ip</i> | 2413 | Philipp et al. 2022 |

399 <sup>1</sup> Internal strain collection numbers (UMa/Ux codes)

400 <sup>2</sup> Plasmids generated in our working group are integrated in a plasmid collection and termed pUMa or pUx plus a 4-digit  
401 number as identifier.

402

### 403 4.3 Cultivation

404 *U. maydis* strains were grown at 28 °C in complete medium supplemented with 1% (w/v) glucose  
405 (CM-glc) if not described differently. Solid media were supplemented with 2% (w/v) agar agar. Growth  
406 phenotypes were evaluated using the BioLector microbioreactor (m2p-labs). MTP-R48-BOH round  
407 plates were inoculated with 1.5 ml culture per well and incubated at 1,000 rpm at 28 °C. Backscatter  
408 light with a gain of 25 or 20 was used to determine biomass.

409

#### 410 **4.4 Quantification of Gus activity on chitin beads**

411 Gus activity was determined to quantify chitin binding of Gus-Cts1 using the specific substrate  
412 4-methylumbelliferyl  $\beta$ -D galactopyranoside (MUG, Sigma–Aldrich). To his end 50  $\mu$ g of *U. maydis*  
413 cell extracts were diluted in chitin binding buffer to a final volume of 500  $\mu$ l. 50  $\mu$ l chitin magnetic  
414 beads (New England Biolabs, Ipswich, MA, USA) were washed with 500  $\mu$ l water, equilibrated with  
415 500  $\mu$ l chitin binding buffer (500 mM NaCl, 50 mM Tris-HCl buffer pH 8.0, 0,05 % Tween-20 (v/v))  
416 and subsequently incubated with cell extracts in binding buffer at 4 °C on a stirring wheel for 16 h.  
417 Subsequently, chitin beads were washed with 500  $\mu$ l chitin binding buffer and 500  $\mu$ l of water, taken  
418 up in 2 $\times$  Gus assay buffer (10 mM sodium phosphate buffer pH 7.0, 28  $\mu$ M  $\beta$ -mercaptoethanol, 0.8  
419 mM EDTA, 0.0042% (v/v) lauroyl-sarcosin, 0.004% (v/v) Triton X-100, 2 mM MUG, 0.2 mg/ml (w/v)  
420 BSA) and transferred to black 96-well plates. Relative fluorescence units (RFUs) were determined  
421 using a plate reader (Tecan, Männedorf, Switzerland) for 100 min at 28 °C with measurements every  
422 5 minutes (excitation/emission wavelengths: 365/465 nm, gain 60). For quantification of conversion  
423 of MUG to the fluorescent product 4-methylumbelliferone (MU), a calibration curve was determined  
424 using 0, 1, 5, 10, 25, 50, 100, 200  $\mu$ M MU.

425

#### 426 **4.5 Trichloroacetic acid precipitation**

427 Gus-Cts1 and Gus-Jps1 secretion was analyzed by TCA precipitation of culture broths.  
428 Therefore, 2 ml of cultures grown in Verduyn medium (55.5 mM Glucose, 74.7 mM NH<sub>4</sub>Cl, 0.81 mM  
429 MgSO<sub>4</sub> $\times$ 7H<sub>2</sub>O, 0.036 mM FeSO<sub>4</sub> $\times$ 7H<sub>2</sub>O, 36.7 mM KH<sub>2</sub>PO<sub>4</sub>, 100 mM MES pH 6.5, 0.051 mM EDTA,  
430 0.025 mM ZnSO<sub>4</sub> $\times$ 7H<sub>2</sub>O, 0.041 mM CaCl<sub>2</sub>, 0.016 mM H<sub>3</sub>bBO<sub>3</sub>, 6.7  $\mu$ M MnCl<sub>2</sub> $\times$ 2H<sub>2</sub>O, 2.3  $\mu$ M  
431 CoCl<sub>2</sub> $\times$ 6H<sub>2</sub>O, 1.9  $\mu$ M CuSO<sub>4</sub> $\times$ 5H<sub>2</sub>O, 1.9  $\mu$ M Na<sub>2</sub>MoO<sub>4</sub> $\times$ 2H<sub>2</sub>O, 0.6  $\mu$ M KI) to an OD<sub>600</sub> of 3 were  
432 harvested by centrifugation at 11.000  $\times$  g and supernatant was transferred to a fresh reaction tube. 1  
433 ml of cell free supernatants of cultures were chilled on ice, mixed with 400  $\mu$ l 50% (v/v) TCA solution  
434 and incubated on ice at 4 °C overnight. Subsequently, protein pellets were harvested by centrifugation

435 at 11.000 × g at 4 °C for 30 min. Supernatants were discarded and pellets were washed with 300 µl of  
436 -20 °C acetone followed by centrifugation at 11.000 × g at 4 °C for 20 min two times. Pellets were  
437 dried at room temperature and resuspended in Laemmli buffer containing 0.12 M NaOH. Resuspended  
438 pellets were denatured at 95 °C for 10 min and then subjected to SDS-PAGE and Western blot analysis.  
439

#### 440 **4.6 Generation of cell extracts**

441 For the verification of protein production via Western blot or further IMAC purification, cultures  
442 were grown to an OD<sub>600</sub> of 1.0 and harvested at 5000 × g for 5 min in centrifugation tubes. Until further  
443 use, pellets were stored at -20 °C. For preparation of cell extracts, cell pellets were resuspended in 1  
444 ml cell extract lysis buffer (100 mM sodium phosphate buffer pH 8.0, 10 mM Tris/HCl pH 8.0, 8 M  
445 urea, 1 mM DTT, 1 mM PMSF, 2.5 mM benzamidine, 1 mM pepstatin A, 2× complete protease  
446 inhibitor cocktail (Roche, Sigma/Aldrich, Billerica, MA, United States) and cells were crushed by  
447 agitation with glass beads at 2,500 rpm for 12 min at 4 °C. After centrifugation (11,000 × g for 30 min  
448 at 4°C), the supernatant was separated from cell debris and was transferred to a fresh reaction tube. For  
449 direct use protein concentration was determined by Bradford assay (BioRad, Hercules, CA, United  
450 States) (Bradford 1976). Otherwise, cell extracts were subjected to IMAC purification.

451

#### 452 **4.7 SDS PAGE and Western blot analysis**

453 To assay protein production and secretion, 10 µg of cell extract or TCA precipitated samples  
454 were subjected to SDS-PAGE. SDS-PAGE was conducted using 10% (w/v) acrylamide gels.  
455 Subsequently, proteins were transferred to methanol activated PVDF membranes using semi-dry  
456 Western blotting. Nanobody fusion proteins were detected using a primary anti-HA (mouse; 1:3,000,  
457 Sigma-Aldrich, St. Louis, MO, USA). An anti-mouse IgG-horseradish peroxidase (HRP) conjugate  
458 (1:3,000 Promega, Fitchburg, United States) was used as secondary antibody. HRP activity was  
459 detected using the Amersham <sup>TM</sup> ECL <sup>TM</sup> Prime Western Blotting Detection Reagent (GE Healthcare,  
460 Chalfont St Giles, United Kingdom) and a LAS4000 chemiluminescence imager (GE Healthcare Life  
461 Sciences, Freiburg, Germany).

462

#### 463 **4.8 IMAC purification of His-tagged protein**

464 Purification of *U. maydis* derived nanobody fusion proteins was achieved by generation of cell  
465 extracts from 400 ml of *U. maydis* culture harvested at an OD<sub>600</sub> of 1.0 and subsequent Nickel<sup>2+</sup>-NTA  
466 purification. Therefore, culture harvested at 5000 × g for 5 min was resuspended in 8 ml lysis buffer  
467 (10 mM imidazole, 50 mM NaH<sub>2</sub>PO<sub>4</sub>, 300 mM NaCl, pH 8.0), 1.6 ml glass beads were added to cell  
468 suspension and cells were crushed by agitation with glass beads at 2,500 rpm at 4 °C for 12 min.  
469 Subsequently, cell debris was removed by centrifugation at 11,000 × g at 4 °C for 30 min. Nickel<sup>2+</sup>-  
470 NTA matrix was settled in empty columns and after flow-through of ethanol, equilibrated with 10  
471 column volumes of lysis buffer. Subsequently, matrix was dissolved in cleared cell extracts and the  
472 mixture was incubated on a stirring wheel at 4 °C for 1 h. Subsequently, flow-through was discarded  
473 and matrix was washed with 5 column volumes of washing buffer (20 mM imidazole 50 mM NaH<sub>2</sub>PO<sub>4</sub>,  
474 300 mM NaCl, pH 8.0). Protein was eluted in two fractions of 2 ml each using elution buffer 1 (lysis  
475 buffer, 150 mM imidazole) and elution buffer 2 (lysis buffer, 250 mM imidazole). For application in  
476 ELISA elution fractions were pooled via Amicon Ultra-15 50k centrifugal filter units (Merck Millipore,  
477 Burlington, MA, USA). Elution buffer was chosen for the intended application (coating buffer for  
478 sandwich ELISA, chitin binding buffer for chitin ELISA, PBS-T for direct detection, see chapters 4.10-  
479 4.11 for buffer composition).

480

## 481 **4.9 *In vivo* neutralization assays**

482 Nanobodies were IMAC purified and stored at 4 °C prior to incubation with SARS-CoV-2.  
483 Nanobodies at concentration of 0.5 mg/ml in PBS-buffer were incubated with SARS-CoV-2 particles  
484 in serial dilutions for 1 h at 37 °C. Subsequently, Vero cells (ATCC-CCL-81) displaying ACE2 were  
485 inoculated with pre incubated samples. After three days of incubation visual microscopic analysis was  
486 conducted using an Eclipse TS100 (Nikon, Minato, Japan) to observe cytopathic effects and thus  
487 determine if infection had occurred. qPCR analysis was conducted using anti-SARS-CoV-2 primer  
488 pairs specific to the E-gene (Corman et al. 2020) and Lightmix Modular SARS and Wuhan CoV E-  
489 gene (Roche Lifescience, Basel, Switzerland) in an ABI 7500 Fast PCR cycler (PE applied biosystems,  
490 Waltham, MA, USA).

## 491 **4.10 Direct ELISA**

492 For detection of nanobody binding activity protein adsorbing 384-well microtiter plates  
493 (Nunc® Maxisorp™, ThermoFisher Scientific, Waltham, MA, USA) were used. Wells were coated  
494 with 1 µg Gfp for anti-GfpNB or 1 µg commercially available SARS-CoV-2 Spike-RBD-domain



495 protein for SARS-CoV-2 nanobody-Cts1-fusion proteins (Invitrogen, Waltham Massachusetts, USA).  
496 Recombinant Gfp was produced in *E. coli* and purified by Ni<sup>2+</sup>-chelate affinity chromatography as  
497 described earlier (Terfrüchte et al. 2017). 1 µg BSA per well dealt as negative control (NEB, Ipswich,  
498 MA, USA). Samples were applied in a final volume of 100 µl coating buffer (100 mM Tris-HCL pH  
499 8, 150 mM NaCl, 1 mM EDTA) per well at room temperature for at least 16 h. Blocking was conducted  
500 for at least 4 h at room temperature with 5% (w/v) skimmed milk in coating buffer. Subsequently, 5%  
501 (w/v) skimmed milk in PBS (137 mM NaCl, 2.7 mM KCl, 10 mM Na<sub>2</sub>HPO<sub>4</sub>, 1.8 mM KH<sub>2</sub>PO<sub>4</sub>, pH  
502 7.2) were added to defined protein amounts of nanobody fusion protein samples purified from culture  
503 supernatants or cell extracts via Ni<sup>2+</sup>-NTA gravity flow and respective controls. 100 µl of sample was  
504 added to wells coated with the cognate antigen and BSA. The plate was incubated with samples and  
505 controls over night at 4 °C. After 3× PBS-T (PBS supplemented with 0.05% (v/v) Tween-20, 100 µl  
506 per well) washing, a primary anti-HA antibody (mouse, Sigma-Aldrich, St. Louis, MO, USA) 1: 5,000  
507 diluted in PBS supplemented with skimmed milk (5% w/v) was added (100 µl per well) and incubated  
508 for 2 h at room temperature. Then wells were washed again three times with PBS-T (100 µl per well)  
509 and incubated with a secondary mouse-HRP antibody (goat, Promega, Madison, WI, USA) (50 µl per  
510 well) for 1 h at room temperature (1: 5,000 in PBS supplemented with skimmed milk (5% w/v)).  
511 Subsequently, wells were washed three times with PBS-T and three times with PBS and incubated with  
512 Quanta Red™ enhanced chemifluorescent HRP substrate (50:50:1, 50 µl per well, ThermoFisher  
513 Scientific, Waltham, MA, USA) at room temperature for 15 min. The reaction was stopped with 10 µl  
514 Quanta Red™ stop solution per well and fluorescence readout was performed at 570 nm excitation and  
515 600 nm emission using an Infinite M200 plate reader (Tecan, Männedorf, Switzerland).  
516 For ELISA against the full-length spike protein, experiments were carried out with the Anti-SARS-  
517 CoV-2-QuantiVac-ELISA (IgG)-Kit (Euroimmun, Lübeck, Germany) according to the manual.  
518 Controls were detected using the secondary anti-human-HRP antibody delivered with the Kit.  
519 Nanobody fusions were detected using anti-HA-HRP (Miltenyi Biotec, Bergisch Gladbach, Germany).

520

#### 521 **4.11 Sandwich ELISA**

522 To determine nanobody-Cts1-fusion capabilities to act as capture antibody for an antigen test  
523 application, a mixture of 0.5 µg of IMAC purified protein and 0.5 µg BSA (New England Biolabs,  
524 Ipswich, MA, USA) in 100 µl of coating buffer per well was added to 384-well microtiter plates (1 µg  
525 without BSA for direct detection). Coating was conducted for 16 h at 4 °C. Subsequently, plates were  
526 blocked with 5% skimmed milk in coating buffer for 2 h at room temperature. RBD samples were

527 added in serial dilutions in a volume of 100  $\mu$ l sample buffer (5% skimmed milk powder in PBS-T)  
528 and incubated for 2 h at room temperature. Subsequently plates were washed 3 times with PBS-T and  
529 primary antibody (anti-RBD-mouse, R&D systems, Minneapolis, MN, USA) was added in a dilution  
530 of 1: 5,000 in sample buffer and incubated for 2 h at room temperature. Afterwards wells were washed  
531 again with PBS-T thrice and incubated with secondary mouse-HRP antibody (goat, Promega,  
532 Fitchburg, WI, United States) was added in a dilution of 1: 5,000 in 50  $\mu$ l sample buffer and incubated  
533 for 1 h at room temperature. Prior to detection plates were washed thrice with 100  $\mu$ l PBS-T and three  
534 times with 100  $\mu$ l PBS per well. Detection was carried out using Quanta Red™ enhanced  
535 chemifluorescent HRP substrate (50:50:1, 50  $\mu$ l per well, ThermoFisher Scientific, Waltham, MA,  
536 USA) at room temperature for 10 min. The reaction was stopped with 10  $\mu$ l Quanta Red™ stop solution  
537 per well and fluorescence readout was performed at 570 nm excitation and 600 nm emission using an  
538 Infinite M200 plate reader (Tecan, Männedorf, Switzerland).

539

#### 540 **4.12 Chitin based sandwich ELISA**

541 For chitin-based sandwich ELISA 50  $\mu$ l of chitin magnetic beads (New England Biolabs,  
542 Ipswich, MA, USA) were transferred into a 1.5 ml reaction tube, washed with 500  $\mu$ l of water and  
543 equilibrated in 500  $\mu$ l of chitin binding buffer (500 mM NaCl, 50 mM Tris-HCl buffer pH 8.0, 0,05%  
544 Tween-20 (v/v)). Subsequently 2  $\mu$ g of IMAC purified protein was added in a final volume of 500  $\mu$ l  
545 chitin binding buffer. Coating was conducted on a stirring wheel at 4 °C for 16 h. Afterwards chitin  
546 beads were blocked with 5% skimmed milk powder in chitin binding buffer on a stirring wheel at room  
547 temperature for 2 h. In the next step chitin beads were washed thrice with PBS-T, RBD samples were  
548 added in serial dilutions in a volume of 100  $\mu$ l ELISA sample buffer and incubated on a stirring wheel  
549 at room temperature for 2 h. After removal of the sample buffer chitin magnetic beads were taken up  
550 in 100  $\mu$ l PBS-T, transferred to a fresh reaction tube and subsequently washed three times with 500  $\mu$ l  
551 PBS-T before addition of primary antibody (R&D systems, Minneapolis, MN, USA) 1:5000 in 200  $\mu$ l  
552 sample buffer. The primary antibody was incubated with chitin magnetic beads on a stirring wheel at  
553 room temperature for 2 h. Subsequent to primary antibody removal chitin magnetic beads were washed  
554 three times with PBS-T and incubated with secondary mouse-HRP antibody (goat, Promega, Fitchburg,  
555 United States) 1:5000 in 100  $\mu$ l sample buffer on a stirring wheel at room temperature for 1 h. For  
556 detection chitin magnetic beads were washed three times with 500  $\mu$ l PBS-T and three times with 500  
557  $\mu$ l PBS before being taken up in 100  $\mu$ l Quanta Red™ enhanced chemifluorescent HRP substrate  
558 (50:50:1, 50  $\mu$ l per well, ThermoFisher Scientific, Waltham, MA, USA) and transferred to a black 96-

559 well microtiter plate. Fluorescence readout was performed 2 min after addition of the substrate at 570  
560 nm excitation and 600 nm emission using an Infinte M200 plate reader (Tecan, Männedorf,  
561 Switzerland) after stopping of the reaction with 10  $\mu$ l QuantaRed™ stop solution.

## 562 **5 Author contributions**

563 M.P., L.M, M.A. and K.P.H designed the experiments. K.P.H. conducted initial chitin binding  
564 experiments (Fig. 3 B). L.M. conducted neutralization experiments and RT-PCR (Fig. 2). M.A.  
565 conducted direct ELISA against full length S1 (Fig. 1 D) M.P. purified nanobodies for neutralization  
566 experiments and direct S1-ELISA and conducted all other experiments. M.P. designed and prepared  
567 the figures and tables. K.S., H.S. and M.F. supervised the project. M.P. prepared the manuscript with  
568 advice from K.S.

569

## 570 **6 Funding**

571 KH was supported by the CLIB-Competence Center Biotechnology (CKB) funded by the  
572 European Regional Development Fund ERDF (34. EFRE-0300096). The work was supported by  
573 grants from the Deutsche Forschungsgemeinschaft under Germany's Excellence Strategy EXC-  
574 2048/1 - Project ID 39068111 to MF and in part by Project-ID 267205415 – SFB 1208 to KS/MF  
575 (project A09, Jps1 research). This work was supported by Stiftung für Altersforschung, Düsseldorf to  
576 H.S.

577

## 578 **7 Acknowledgements**

579 We acknowledge B. Axler for excellent support in molecular cloning and strain generation.

580

581

582

583

584

585

586

587

588

589

## 590 8 References

- 591 **Andryukov BG.** (2020). Six decades of lateral flow immunoassay: from determining metabolic  
592 markers to diagnosing COVID-19. *AIMS Microbiol.* **6**:280-304. Epub 20200826 DOI:  
593 10.3934/microbiol.2020018
- 594 **Baker AN, Richards SJ, Guy CS, Congdon TR, Hasan M, Zwetsloot AJ, Gallo A, Lewandowski**  
595 **JR, Stansfeld PJ, Straube A, et al.** (2020). The SARS-CoV-2 Spike Protein Binds Sialic  
596 Acids and Enables Rapid Detection in a Lateral Flow Point of Care Diagnostic Device. *ACS*  
597 *Cent Sci.* Nov 25;**6**:2046-2052. Epub 20200923 DOI: 10.1021/acscentsci.0c00855
- 598 **Bannas P, Hambach J, Koch-Nolte F.** (2017). Nanobodies and Nanobody-Based Human Heavy  
599 Chain Antibodies As Antitumor Therapeutics. *Front Immunol.* **8**:1603. Epub 20171122 DOI:  
600 10.3389/fimmu.2017.01603
- 601 **Baral P, Bhattarai N, Hossen ML, Stebliankin V, Gerstman BS, Narasimhan G, Chapagain PP.**  
602 (2021). Mutation-induced changes in the receptor-binding interface of the SARS-CoV-2 Delta  
603 variant B.1.617.2 and implications for immune evasion. *Biochem Biophys Res Commun.* Oct  
604 15;**574**:14-19. Epub 20210815 DOI: 10.1016/j.bbrc.2021.08.036
- 605 **Bierle DM, Ganesh R, Razonable RR.** (2021). Breakthrough COVID-19 and casirivimab-imdevimab  
606 treatment during a SARS-CoV-2 B.1.617.2 (Delta) surge. *J Clin Virol.* Dec;**145**:105026. Epub  
607 20211108 DOI: 10.1016/j.jcv.2021.105026
- 608 **Billingsley MM, Riley RS, Day ES.** (2017). Antibody-nanoparticle conjugates to enhance the  
609 sensitivity of ELISA-based detection methods. *PLoS One.* **12**:e0177592. Epub 20170511 DOI:  
610 10.1371/journal.pone.0177592
- 611 **Callaway E.** (2020). COVID vaccine excitement builds as Moderna reports third positive result.  
612 *Nature.* Nov;**587**:337-338 DOI: 10.1038/d41586-020-03248-7
- 613 **Chong S, Mersha FB, Comb DG, Scott ME, Landry D, Vence LM, Perler FB, Benner J, Kucera**  
614 **RB, Hirvonen CA, et al.** (1997). Single-column purification of free recombinant proteins using  
615 a self-cleavable affinity tag derived from a protein splicing element. *Gene.* Jun 19;**192**:271-281  
616 DOI: 10.1016/s0378-1119(97)00105-4
- 617 **Chong S, Williams KS, Wotkowicz C, Xu MQ.** (1998). Modulation of protein splicing of the  
618 *Saccharomyces cerevisiae* vacuolar membrane ATPase intein. *J Biol Chem.* Apr 24;**273**:10567-  
619 10577 DOI: 10.1074/jbc.273.17.10567
- 620 **Corman VM, Landt O, Kaiser M, Molenkamp R, Meijer A, Chu DK, Bleicker T, Brunink S,**  
621 **Schneider J, Schmidt ML, et al.** (2020). Detection of 2019 novel coronavirus (2019-nCoV)  
622 by real-time RT-PCR. *Euro Surveill.* Jan;**25** DOI: 10.2807/1560-7917.ES.2020.25.3.2000045
- 623 **Custodio TF, Das H, Sheward DJ, Hanke L, Pazicky S, Pieprzyk J, Sorgenfrei M, Schroer MA,**  
624 **Gruzinov AY, Jeffries CM, et al.** (2020). Selection, biophysical and structural analysis of  
625 synthetic nanobodies that effectively neutralize SARS-CoV-2. *Nat Commun.* Nov 4;**11**:5588.  
626 Epub 20201104 DOI: 10.1038/s41467-020-19204-y
- 627 **Fernandes CS, Dos Santos R, Ottengy S, Viecinski AC, Behar G, Mouratou B, Pecorari F, Roque**  
628 **AC.** (2016). Affitins for protein purification by affinity magnetic fishing. *J Chromatogr A.* Jul  
629 29;**1457**:50-58. Epub 20160607 DOI: 10.1016/j.chroma.2016.06.020
- 630 **Fernandes Q, Inchakalody VP, Merhi M, Mestiri S, Taib N, Moustafa Abo El-Ella D, Bedhiafi**  
631 **T, Raza A, Al-Zaidan L, Mohsen MO, et al.** (2022). Emerging COVID-19 variants and their

- 632 impact on SARS-CoV-2 diagnosis, therapeutics and vaccines. *Ann Med.* Dec;**54**:524-540 DOI:  
633 10.1080/07853890.2022.2031274
- 634 **Field J, Nikawa J, Broek D, MacDonald B, Rodgers L, Wilson IA, Lerner RA, Wigler M.** (1988).  
635 Purification of a RAS-responsive adenylyl cyclase complex from *Saccharomyces cerevisiae* by  
636 use of an epitope addition method. *Mol Cell Biol.* May;**8**:2159-2165 DOI:  
637 10.1128/mcb.8.5.2159-2165.1988
- 638 **Fleissner A, Dersch P.** (2010). Expression and export: recombinant protein production systems for  
639 *Aspergillus*. *Appl Microbiol Biotechnol.* Jul;**87**:1255-1270. Epub 2010/06/10 DOI:  
640 10.1007/s00253-010-2672-6
- 641 **Franzreb M, Siemann-Herzberg M, Hobley TJ, Thomas OR.** (2006). Protein purification using  
642 magnetic adsorbent particles. *Appl Microbiol Biotechnol.* May;**70**:505-516. Epub 20060223  
643 DOI: 10.1007/s00253-006-0344-3
- 644 **Gauhar A, Privezentzev CV, Demydchuk M, Gerlza T, Rieger J, Kungl AJ, Walsh FS, Rutkowski  
645 JL, Stocki P.** (2021). Single domain shark VNAR antibodies neutralize SARS-CoV-2 infection  
646 in vitro. *FASEB J.* Nov;**35**:e21970 DOI: 10.1096/fj.202100986RR
- 647 **Gibson DG, Young L, Chuang RY, Venter JC, Hutchison CA, 3rd, Smith HO.** (2009). Enzymatic  
648 assembly of DNA molecules up to several hundred kilobases. *Nat Methods.* May;**6**:343-345.  
649 Epub 2009/04/14 DOI: 10.1038/nmeth.1318
- 650 **Grant BD, Anderson CE, Williford JR, Alonzo LF, Glukhova VA, Boyle DS, Weigl BH, Nichols  
651 KP.** (2020). SARS-CoV-2 Coronavirus Nucleocapsid Antigen-Detecting Half-Strip Lateral  
652 Flow Assay Toward the Development of Point of Care Tests Using Commercially Available  
653 Reagents. *Anal Chem.* Aug 18;**92**:11305-11309. Epub 20200805 DOI:  
654 10.1021/acs.analchem.0c01975
- 655 **Gu S, Tian Y, Liang K, Ji Y.** (2021). Chitin nanocrystals assisted 3D printing of polycitrate thermoset  
656 bioelastomers. *Carbohydr Polym.* Mar 15;**256**:117549. Epub 20201220 DOI:  
657 10.1016/j.carbpol.2020.117549
- 658 **Guerrero F, Ciragan A, Iwai H.** (2015). Tandem SUMO fusion vectors for improving soluble protein  
659 expression and purification. *Protein Expr Purif.* Dec;**116**:42-49. Epub 20150820 DOI:  
660 10.1016/j.pep.2015.08.019
- 661 **Hulswit RJ, de Haan CA, Bosch BJ.** (2016). Coronavirus Spike Protein and Tropism Changes. *Adv  
662 Virus Res.***96**:29-57. Epub 20160913 DOI: 10.1016/bs.aivir.2016.08.004
- 663 **Huo J, Le Bas A, Ruza RR, Duyvesteyn HME, Mikolajek H, Malinauskas T, Tan TK, Rijal P,  
664 Dumoux M, Ward PN, et al.** (2020). Neutralizing nanobodies bind SARS-CoV-2 spike RBD  
665 and block interaction with ACE2. *Nat Struct Mol Biol.* Sep;**27**:846-854. Epub 20200713 DOI:  
666 10.1038/s41594-020-0469-6
- 667 **Jain J, Gaur S, Chaudhary Y, Kaul R.** (2020). The molecular biology of intracellular events during  
668 Coronavirus infection cycle. *Virusdisease.* Jun;**31**:75-79. Epub 20200504 DOI:  
669 10.1007/s13337-020-00591-1
- 670 **Juarez-Montiel M, Ruiloba de Leon S, Chavez-Camarillo G, Hernandez-Rodriguez C, Villa-  
671 Tanaca L.** (2011). Huitlacoche (corn smut), caused by the phytopathogenic fungus *Ustilago  
672 maydis*, as a functional food. *Rev Iberoam Micol.* Apr-Jun;**28**:69-73. Epub 20110223 DOI:  
673 10.1016/j.riam.2011.01.001



- 674 **Kirchdoerfer RN, Cottrell CA, Wang N, Pallesen J, Yassine HM, Turner HL, Corbett KS,**  
675 **Graham BS, McLellan JS, Ward AB.** (2016). Pre-fusion structure of a human coronavirus  
676 spike protein. *Nature*. Mar 3;**531**:118-121 DOI: 10.1038/nature17200
- 677 **Ko H, Kang M, Kim MJ, Yi J, Kang J, Bae JH, Sohn JH, Sung BH.** (2021). A novel protein fusion  
678 partner, carbohydrate-binding module family 66, to enhance heterologous protein expression  
679 in *Escherichia coli*. *Microb Cell Fact*. Dec 28;**20**:232. Epub 20211228 DOI: 10.1186/s12934-  
680 021-01725-w
- 681 **König PA, Das H, Liu H, Kummerer BM, Gohr FN, Jenster LM, Schiffelers LDJ, Tesfamariam**  
682 **YM, Uchima M, Wuerth JD, et al.** (2021). Structure-guided multivalent nanobodies block  
683 SARS-CoV-2 infection and suppress mutational escape. *Science*. Feb 12;**371**. Epub 2021/01/14  
684 DOI: 10.1126/science.abe6230
- 685 **Korber B, Fischer WM, Gnanakaran S, Yoon H, Theiler J, Abfalterer W, Hengartner N, Giorgi**  
686 **EE, Bhattacharya T, Foley B, et al.** (2020). Tracking Changes in SARS-CoV-2 Spike:  
687 Evidence that D614G Increases Infectivity of the COVID-19 Virus. *Cell*. Aug 20;**182**:812-827  
688 e819. Epub 20200703 DOI: 10.1016/j.cell.2020.06.043
- 689 **Kovalchuk V, Voronkina A, Binnewerg B, Schubert M, Muzychka L, Wysokowski M, Tsurkan**  
690 **MV, Bechmann N, Petrenko I, Fursov A, et al.** (2019). Naturally Drug-Loaded Chitin:  
691 Isolation and Applications. *Mar Drugs*. Oct 10;**17**. Epub 20191010 DOI:  
692 10.3390/md17100574
- 693 **Kudlay D, Svistunov A.** (2022). COVID-19 Vaccines: An Overview of Different Platforms.  
694 *Bioengineering (Basel)*. Feb 12;**9**. Epub 20220212 DOI: 10.3390/bioengineering9020072
- 695 **Li W, Moore MJ, Vasilieva N, Sui J, Wong SK, Berne MA, Somasundaran M, Sullivan JL,**  
696 **Luzuriaga K, Greenough TC, et al.** (2003). Angiotensin-converting enzyme 2 is a functional  
697 receptor for the SARS coronavirus. *Nature*. Nov 27;**426**:450-454 DOI: 10.1038/nature02145
- 698 **Lin AV.** (2015). Direct ELISA. *Methods Mol Biol*.**1318**:61-67 DOI: 10.1007/978-1-4939-2742-5\_6
- 699 **Marrocco I, Romaniello D, Yarden Y.** (2019). Cancer Immunotherapy: The Dawn of Antibody  
700 Cocktails. *Methods Mol Biol*.**1904**:11-51 DOI: 10.1007/978-1-4939-8958-4\_2
- 701 **Mastrangeli R, Audino MC, Palinsky W, Broly H, Bierau H.** (2020). The Formidable Challenge of  
702 Controlling High Mannose-Type N-Glycans in Therapeutic mAbs. *Trends Biotechnol*.  
703 Oct;**38**:1154-1168. Epub 20200629 DOI: 10.1016/j.tibtech.2020.05.009
- 704 **Matusali G, Colavita F, Lapa D, Meschi S, Bordini L, Piselli P, Gagliardini R, Corpilongo A,**  
705 **Nicastri E, Antinori A, et al.** (2021). SARS-CoV-2 Serum Neutralization Assay: A Traditional  
706 Tool for a Brand-New Virus. *Viruses*. Apr 10;**13**. Epub 20210410 DOI: 10.3390/v13040655
- 707 **Müller L, Ostermann PN, Walker A, Wienemann T, Mertens A, Adams O, Andree M, Hauka S,**  
708 **Lubke N, Keitel V, et al.** (2021). Sensitivity of anti-SARS-CoV-2 serological assays in a high-  
709 prevalence setting. *Eur J Clin Microbiol Infect Dis*. May;**40**:1063-1071. Epub 20210203 DOI:  
710 10.1007/s10096-021-04169-7
- 711 **Muyldermans S.** (2013). Nanobodies: natural single-domain antibodies. *Annu Rev Biochem*.**82**:775-  
712 797. Epub 2013/03/19 DOI: 10.1146/annurev-biochem-063011-092449
- 713 **Muyldermans S, Baral TN, Retamozzo VC, De Baetselier P, De Genst E, Kinne J, Leonhardt H,**  
714 **Magez S, Nguyen VK, Revets H, et al.** (2009). Camelid immunoglobulins and nanobody  
715 technology. *Vet Immunol Immunopathol*. Mar 15;**128**:178-183. Epub 20081017 DOI:  
716 10.1016/j.vetimm.2008.10.299

- 717 **Oldenburg SJ, Averitt RD, Westcott SL, Halas NJ.** (1998 ). Nanoengineering of optical resonances.  
718 *Chemical Physics Letters*.**288**:234-247
- 719 **Ou X, Liu Y, Lei X, Li P, Mi D, Ren L, Guo L, Guo R, Chen T, Hu J, et al.** (2020). Characterization  
720 of spike glycoprotein of SARS-CoV-2 on virus entry and its immune cross-reactivity with  
721 SARS-CoV. *Nat Commun.* Mar 27;**11**:1620. Epub 20200327 DOI: 10.1038/s41467-020-  
722 15562-9
- 723 **Philipp M, Hussnaetter KP, Reindl M, Muntjes K, Feldbrugge M, Schipper K.** (2021). A Novel  
724 Potent Carrier for Unconventional Protein Export in *Ustilago maydis*. *Front Cell Dev*  
725 *Biol.***9**:816335. Epub 20220110 DOI: 10.3389/fcell.2021.816335
- 726 **Porath J, Carlsson J, Olsson I, Belfrage G.** (1975). Metal chelate affinity chromatography, a new  
727 approach to protein fractionation. *Nature.* Dec 18;**258**:598-599 DOI: 10.1038/258598a0
- 728 **Pymm P, Adair A, Chan LJ, Cooney JP, Mordant FL, Allison CC, Lopez E, Haycroft ER, O'Neill**  
729 **MT, Tan LL, et al.** (2021). Nanobody cocktails potently neutralize SARS-CoV-2 D614G  
730 N501Y variant and protect mice. *Proc Natl Acad Sci U S A.* May 11;**118** DOI:  
731 10.1073/pnas.2101918118
- 732 **Reindl M, Hansch S, Weidtkamp-Peters S, Schipper K.** (2019). A Potential Lock-Type Mechanism  
733 for Unconventional Secretion in Fungi. *Int J Mol Sci.* Jan 22;**20**. Epub 2019/01/27 DOI:  
734 10.3390/ijms20030460
- 735 **Reindl M, Stock J, Hussnaetter KP, Genc A, Brachmann A, Schipper K.** (2020). A Novel Factor  
736 Essential for Unconventional Secretion of Chitinase Cts1. *Front Microbiol.***11**:1529. Epub  
737 2020/08/01 DOI: 10.3389/fmicb.2020.01529
- 738 **Salvador JP, Vilaplana L, Marco MP.** (2019). Nanobody: outstanding features for diagnostic and  
739 therapeutic applications. *Anal Bioanal Chem.* Mar;**411**:1703-1713. Epub 20190208 DOI:  
740 10.1007/s00216-019-01633-4
- 741 **Santos RD, Iria I, Manuel AM, Leandro AP, Madeira CAC, Goncalves J, Carvalho AL, Roque**  
742 **ACA.** (2020). Magnetic Precipitation: A New Platform for Protein Purification. *Biotechnol J.*  
743 Sep;**15**:e2000151. Epub 20200708 DOI: 10.1002/biot.202000151
- 744 **Sarkari P, Reindl M, Stock J, Müller O, Kahmann R, Feldbrugge M, Schipper K.** (2014).  
745 Improved expression of single-chain antibodies in *Ustilago maydis*. *J Biotechnol.* Dec  
746 10;**191**:165-175. Epub 2014/07/06 DOI: 10.1016/j.jbiotec.2014.06.028
- 747 **Stock J, Sarkari P, Kreibich S, Brefort T, Feldbrugge M, Schipper K.** (2012). Applying  
748 unconventional secretion of the endochitinase Cts1 to export heterologous proteins in *Ustilago*  
749 *maydis*. *J Biotechnol.* Oct 15;**161**:80-91. Epub 2012/03/27 DOI: 10.1016/j.jbiotec.2012.03.004
- 750 **Stock J, Terfruchte M, Schipper K.** (2016). A Reporter System to Study Unconventional Secretion  
751 of Proteins Avoiding N-Glycosylation in *Ustilago maydis*. *Methods Mol Biol.***1459**:149-160.  
752 Epub 2016/09/26 DOI: 10.1007/978-1-4939-3804-9\_10
- 753 **Sun X, Yang S, Al-Dossary AA, Broitman S, Ni Y, Guan M, Yang M, Li J.** (2022). Nanobody-  
754 Functionalized Cellulose for Capturing SARS-CoV-2. *Appl Environ Microbiol.* Mar  
755 8;**88**:e0230321. Epub 20220105 DOI: 10.1128/aem.02303-21
- 756 **Sun Y, Ho M.** (2020). Emerging antibody-based therapeutics against SARS-CoV-2 during the global  
757 pandemic. *Antib Ther.* Dec;**3**:246-256. Epub 2021/04/30 DOI: 10.1093/abt/tbaa025



- 758 **Terfrüchte M, Reindl M, Jankowski S, Sarkari P, Feldbrugge M, Schipper K.** (2017). Applying  
759 Unconventional Secretion in *Ustilago maydis* for the Export of Functional Nanobodies. *Int J*  
760 *Mol Sci.* Apr 29;**18**. Epub 2017/05/05 DOI: 10.3390/ijms18050937
- 761 **Terfrüchte M, Wewetzer S, Sarkari P, Stollewerk D, Franz-Wachtel M, Macek B, Schlepütz T,**  
762 **Feldbrugge M, Buchs J, Schipper K.** (2018). Tackling destructive proteolysis of  
763 unconventionally secreted heterologous proteins in *Ustilago maydis*. *J Biotechnol.* Oct  
764 **20**;**284**:37-51. Epub 2018/08/01 DOI: 10.1016/j.jbiotec.2018.07.035
- 765 **Torjesen I.** (2021). Covid-19: Omicron may be more transmissible than other variants and partly  
766 resistant to existing vaccines, scientists fear. *BMJ.* Nov 29;**375**:n2943. Epub 20211129 DOI:  
767 10.1136/bmj.n2943
- 768 **VanBlargan LA, Errico JM, Halfmann PJ, Zost SJ, Crowe JE, Jr., Purcell LA, Kawaoka Y,**  
769 **Corti D, Fremont DH, Diamond MS.** (2022). An infectious SARS-CoV-2 B.1.1.529 Omicron  
770 virus escapes neutralization by therapeutic monoclonal antibodies. *Nat Med.* Jan 19. Epub  
771 20220119 DOI: 10.1038/s41591-021-01678-y
- 772 **Walls AC, Park YJ, Tortorici MA, Wall A, McGuire AT, Veerler D.** (2020). Structure, Function,  
773 and Antigenicity of the SARS-CoV-2 Spike Glycoprotein. *Cell.* Apr 16;**181**:281-292 e286.  
774 Epub 20200309 DOI: 10.1016/j.cell.2020.02.058
- 775 **Walter JD, Hutter CZ, I. Wyss, M.; , Earp J, Egloff P, Sorgenfrei MH, L. M. Gonda, I. , Meier**  
776 **G, Remm ST, S. Plattet, P. , Seeger MA.** (2020). Sybodies targeting the SARS-CoV-2  
777 receptor-binding domain. *bioRxiv.* DOI: 10.1101/2020.04.16.045419
- 778 **Wang Q, Zhang Y, Wu L, Niu S, Song C, Zhang Z, Lu G, Qiao C, Hu Y, Yuen KY, et al.** (2020a).  
779 Structural and Functional Basis of SARS-CoV-2 Entry by Using Human ACE2. *Cell.* May  
780 **14**;**181**:894-904 e899. Epub 20200409 DOI: 10.1016/j.cell.2020.03.045
- 781 **Wang Q, Zhong C, Xiao H.** (2020b). Genetic Engineering of Filamentous Fungi for Efficient Protein  
782 Expression and Secretion. *Front Bioeng Biotechnol.***8**:293. Epub 2020/04/24 DOI:  
783 10.3389/fbioe.2020.00293
- 784 **Weinstein JB, Bates TA, Leier HC, McBride SK, Barklis E, Tafesse FG.** (2022). A potent alpaca-  
785 derived nanobody that neutralizes SARS-CoV-2 variants. *iScience.* Mar 18;**25**:103960. Epub  
786 20220222 DOI: 10.1016/j.isci.2022.103960
- 787 **Wrapp D, De Vlieger D, Corbett KS, Torres GM, Wang N, Van Breedam W, Roose K, van Schie**  
788 **L, Team V-CC-R, Hoffmann M, et al.** (2020a). Structural Basis for Potent Neutralization of  
789 Betacoronaviruses by Single-Domain Camelid Antibodies. *Cell.* May 28;**181**:1004-1015  
790 e1015. Epub 20200505 DOI: 10.1016/j.cell.2020.04.031
- 791 **Wrapp D, Wang N, Corbett KS, Goldsmith JA, Hsieh CL, Abiona O, Graham BS, McLellan JS.**  
792 (2020b). Cryo-EM structure of the 2019-nCoV spike in the prefusion conformation. *Science.*  
793 Mar 13;**367**:1260-1263. Epub 20200219 DOI: 10.1126/science.abb2507
- 794 **Xu Y, Xu Y, Bi B, Hou M, Yao L, Du Q, He A, Liu Y, Miao C, Liang X, et al.** (2020). A moldable  
795 thermosensitive hydroxypropyl chitin hydrogel for 3D cartilage regeneration in vitro and in  
796 vivo. *Acta Biomater.* May;**108**:87-96. Epub 20200405 DOI: 10.1016/j.actbio.2020.03.039
- 797 **Zhong Y, Liu X, Xiao P, Wei S, Wang T.** (2011). Expression and secretion of the human  
798 erythropoietin using an optimized cbh1 promoter and the native CBH I signal sequence in the  
799 industrial fungus *Trichoderma reesei*. *Appl Biochem Biotechnol.* Nov;**165**:1169-1177. Epub  
800 20110816 DOI: 10.1007/s12010-011-9334-8

801 **Zhuang J, Yin J, Lv S, Wang B, Mu Y.** (2020). Advanced "lab-on-a-chip" to detect viruses - Current  
802 challenges and future perspectives. *Biosens Bioelectron.* Sep 1;**163**:112291. Epub 20200512  
803 DOI: 10.1016/j.bios.2020.112291

804

**A**

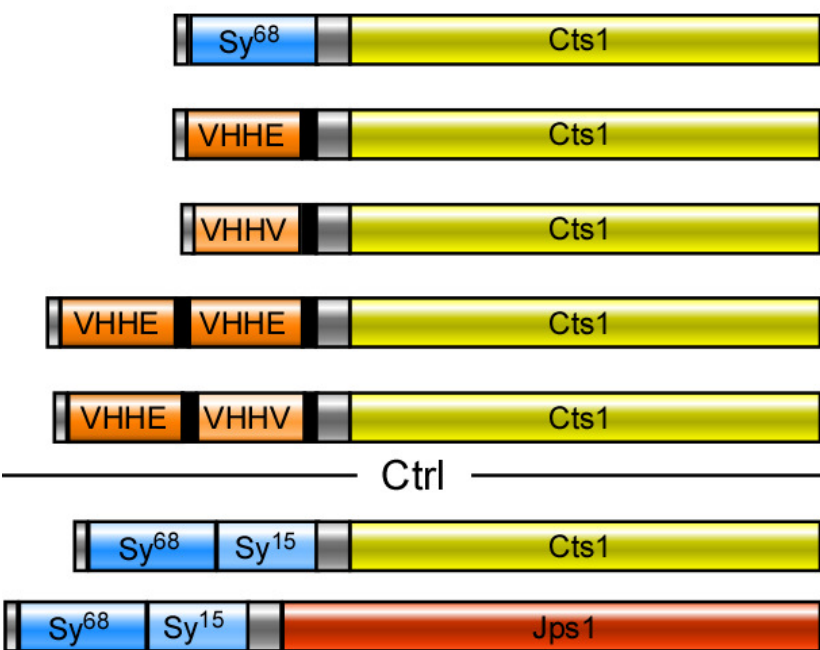

**B**

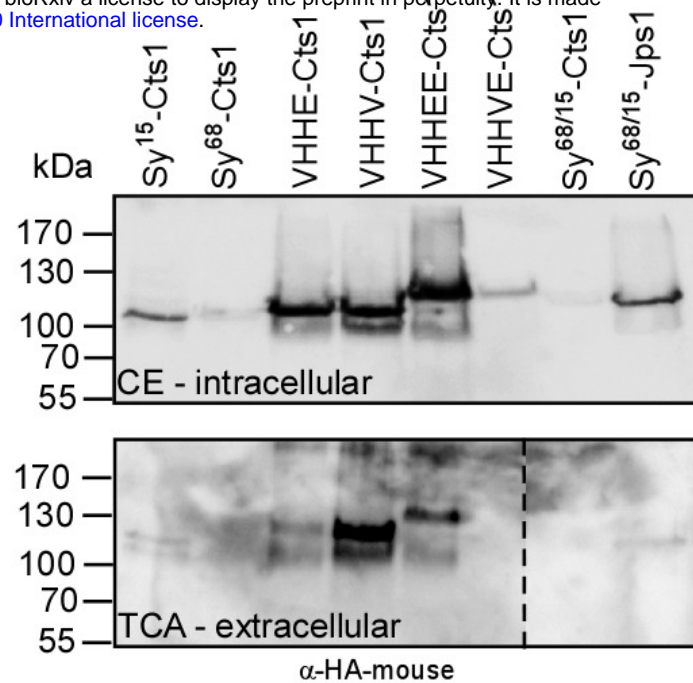

**C**

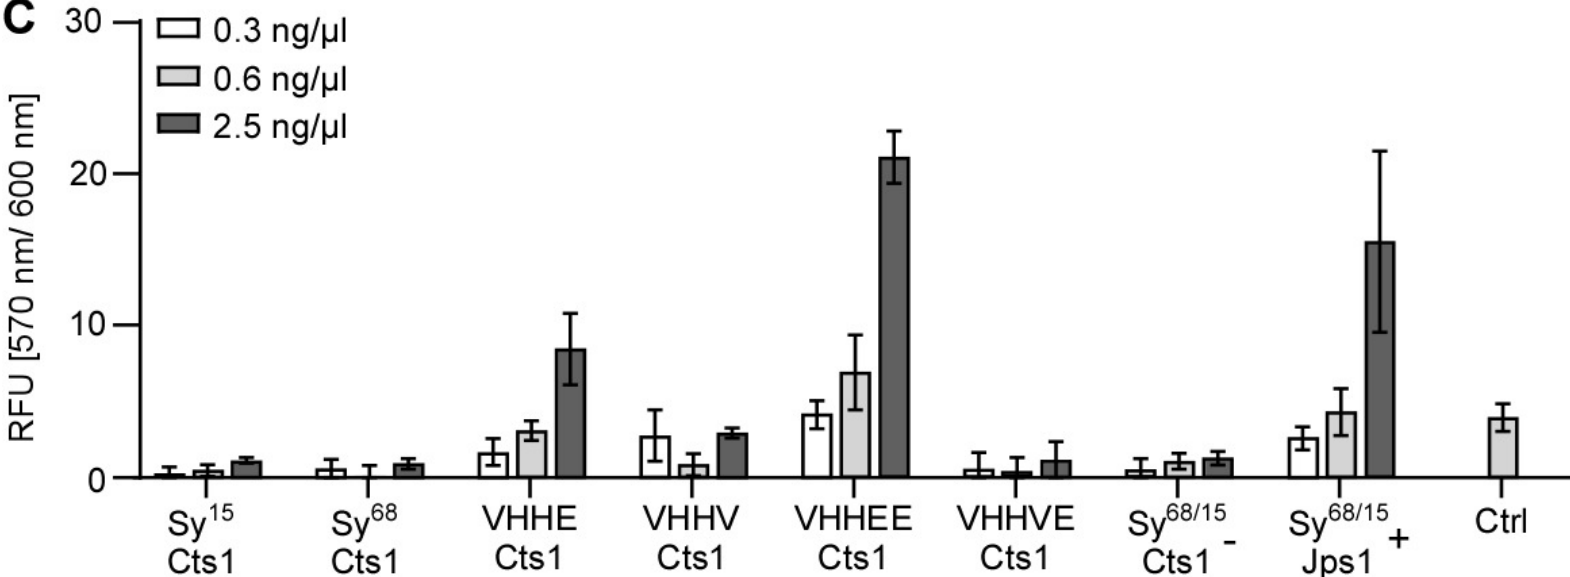

**D**

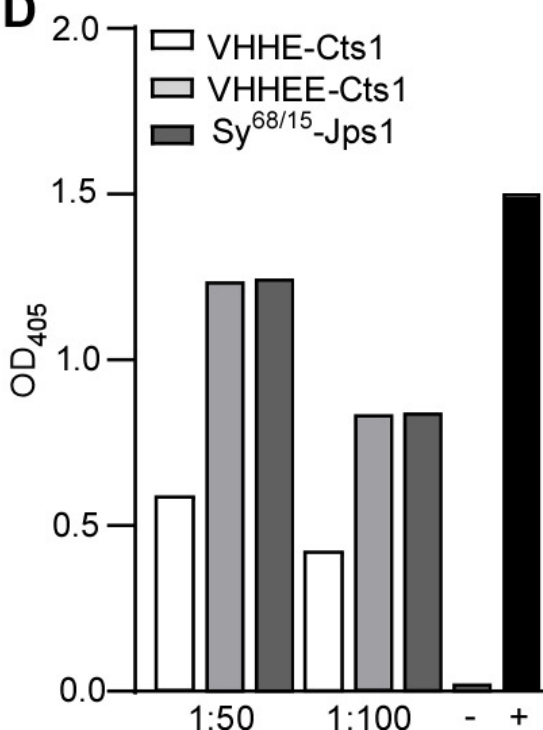

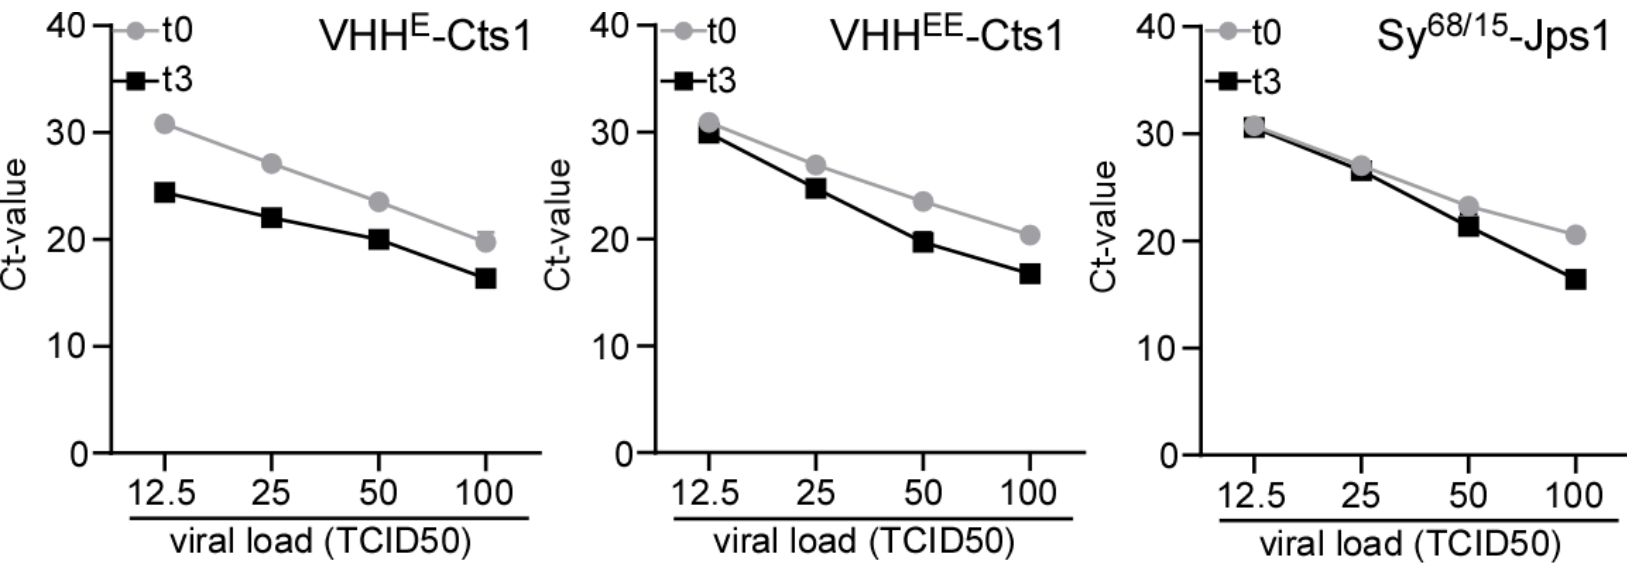

**A**

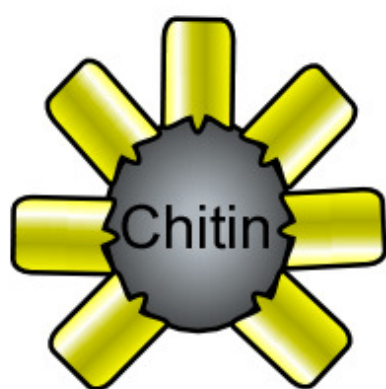

**B**

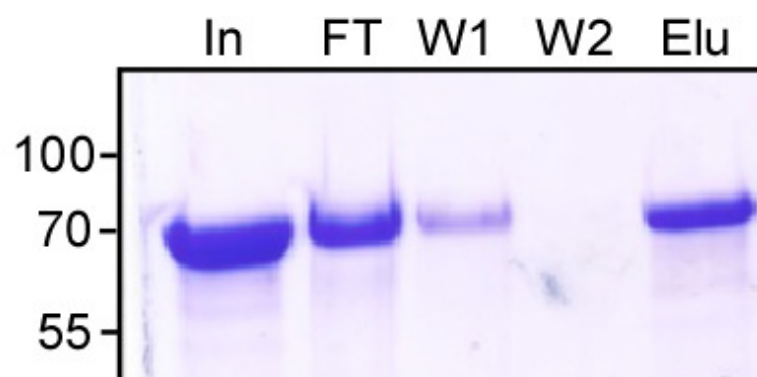

**C**

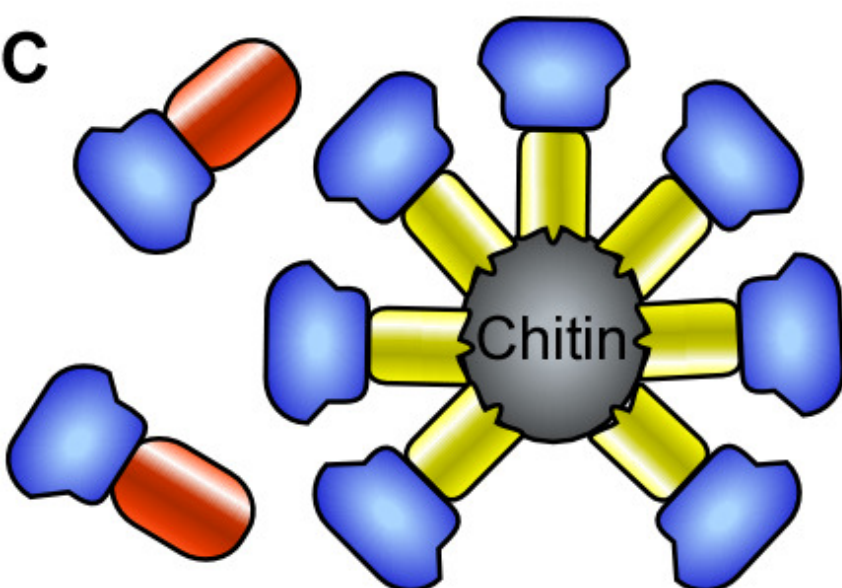

**D**

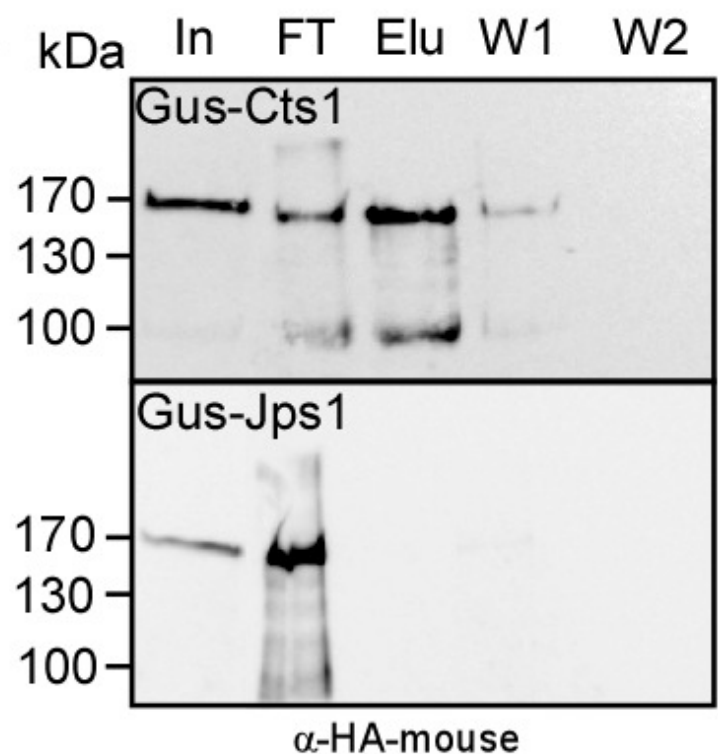

**E**

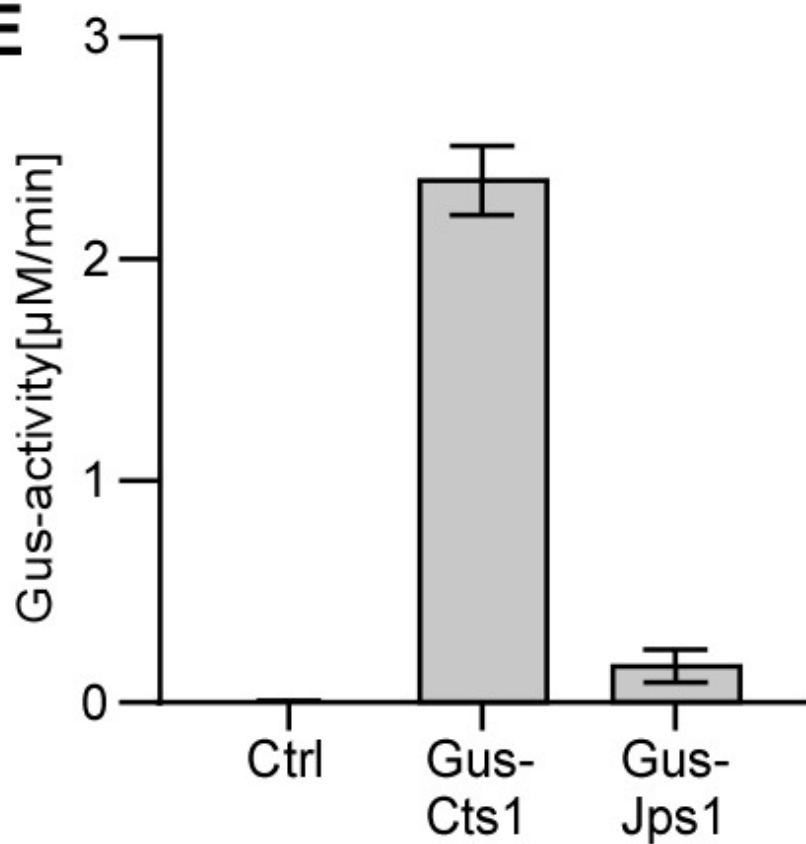

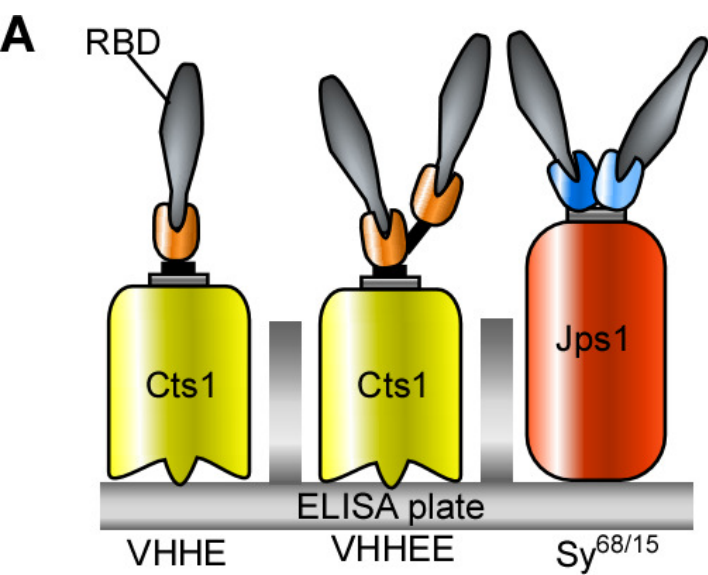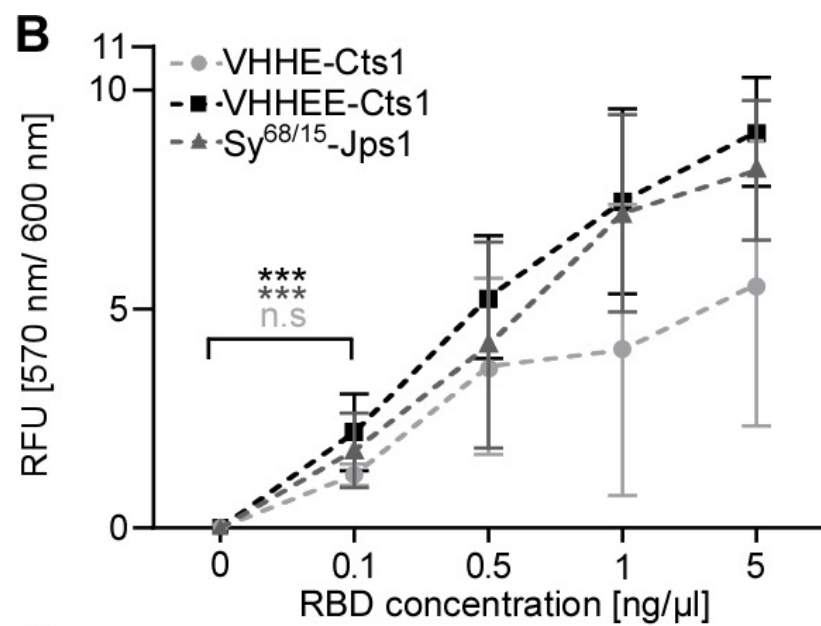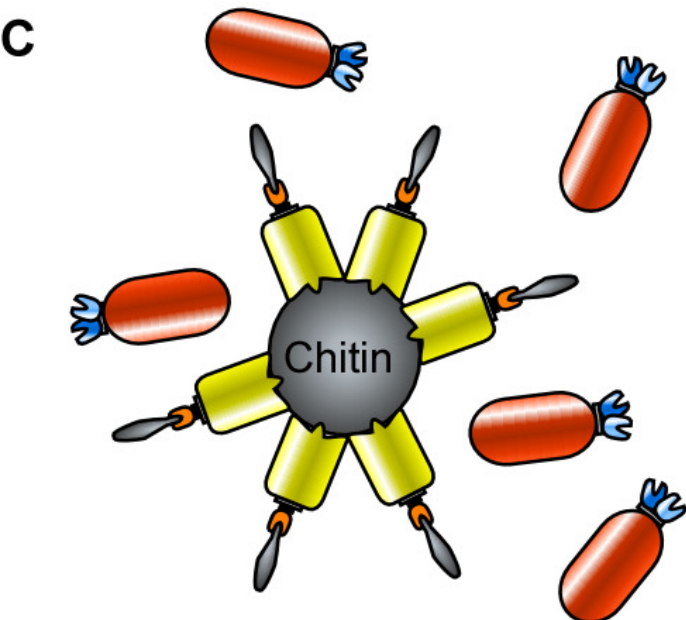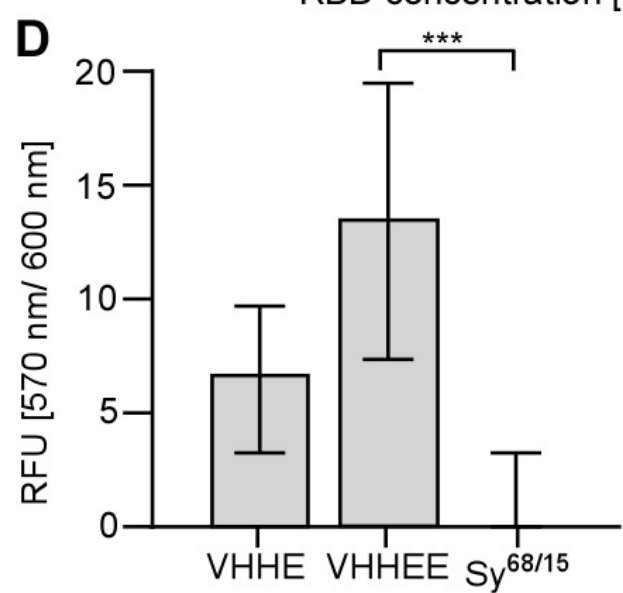



**A**

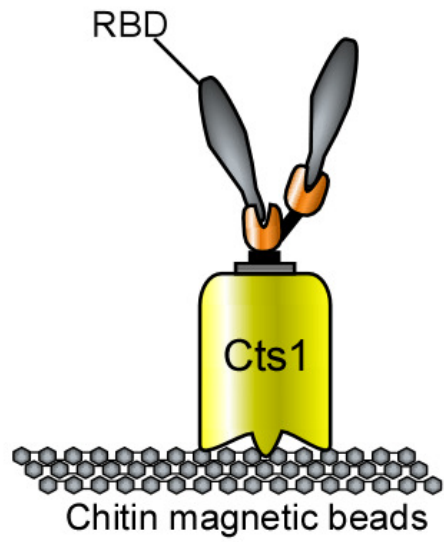

**B**

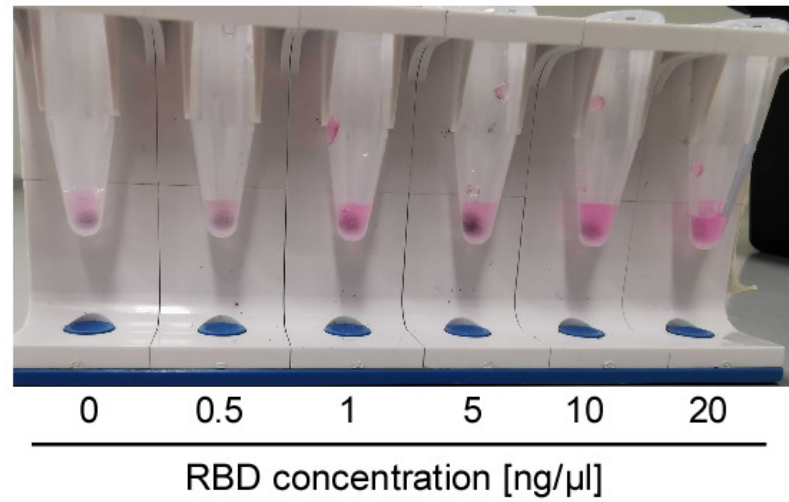

**C**

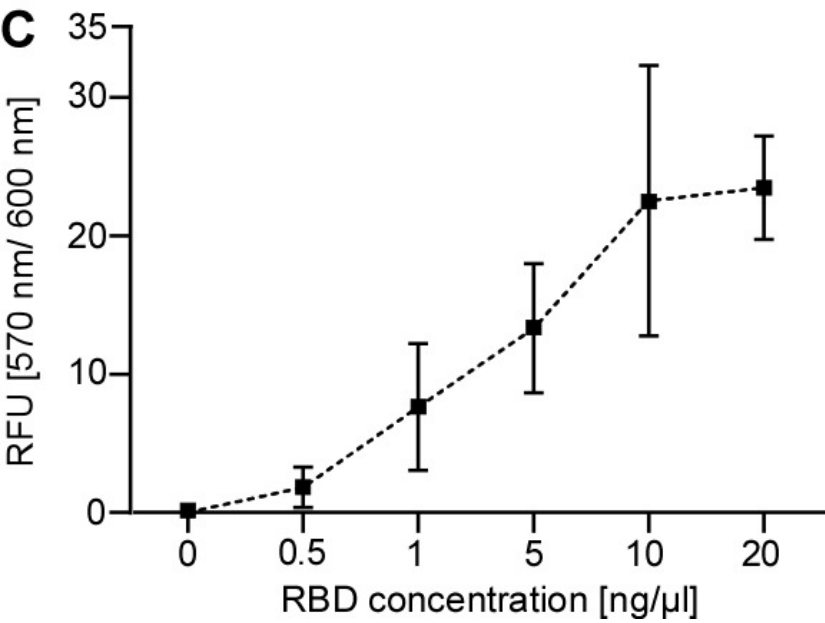

Source: https://www.biorxiv.org/content/10.1101/2022.11.11.516239v1.full.pdf
